# Supplementary material for: Genome-wide fine-mapping improves identification of causal variants
Source: Research Square preprint supplement (doi:10.21203/rs.3.rs-4759390/v1), 2024-08-07
Supplement: Supplementary file 1 [file 459d616ffc29e8a435f68f50.xlsx]

## Sheet: Sheet1
Supplementary Table 4 Fine-mapped variants for schizophrenia (SCZ) and Crohn's diseases (CD)
Trait	Name	Chrom	Position	A1	A2	A1Frq	A1Effect	SE	VarExplained	PIP
SCZ	rs10875085	1	97885249	T	A	0.181	0.016473	0.006739	9.39179e-05	0.948671
SCZ	rs12991836	2	145141541	C	A	0.357	0.013663	0.004813	9.63445e-05	0.971364
SCZ	rs79650876	3	187997616	A	G	0.181	0.013006	0.006256	6.17562e-05	0.93205
SCZ	rs13107325	4	103188709	T	C	0.067	0.044173	0.006423	0.000249113	1
SCZ	rs1593304	7	131619847	G	A	0.801	0.015837	0.005633	9.00731e-05	0.987551
SCZ	rs2078266	9	138378856	G	A	0.829	-0.017987	0.004699	9.79912e-05	0.98915
SCZ	rs324017	12	57487814	C	A	0.71	0.015368	0.006243	0.000113312	0.932216
SCZ	rs61937595	12	57682956	T	C	0.092	-0.030933	0.01045	0.000178108	0.94272
SCZ	rs33996476	12	77235768	G	A	0.106	0.017055	0.007726	6.64417e-05	0.930727
SCZ	rs11854184	15	49293194	A	C	0.213	0.012609	0.005617	6.38831e-05	0.924173
SCZ	rs4702	15	91426560	A	G	0.56	-0.021914	0.004464	0.000246467	0.997116
SCZ	rs11045	15	96883321	T	G	0.225	0.010684	0.005177	4.91526e-05	0.959793
SCZ	rs72986630	19	11849736	T	C	0.068	0.024617	0.009519	8.82944e-05	0.946124
CD	rs7539643	1	67672911	T	C	0.290601	0.054227	0.006916	0.00123214	1
CD	rs11209026	1	67705958	A	G	0.069583	-0.130254	0.009759	0.00220917	1
CD	rs2476601	1	114377568	A	G	0.099117	-0.054566	0.008573	0.00054485	0.999985
CD	rs34687326	1	159799910	A	G	0.099182	-0.028515	0.006792	0.000153534	0.987375
CD	rs36113629	2	28790751	A	T	0.3573	0.013428	0.006082	9.98031e-05	0.924748
CD	rs3749171	2	241569692	T	C	0.156497	0.025276	0.010377	0.000197098	0.914089
CD	rs6445040	3	171858523	G	A	0.333831	0.013828	0.004733	9.5009e-05	0.976999
CD	rs61733402	4	6610889	A	G	0.093081	-0.026227	0.010816	0.000135882	0.922824
CD	rs13107325	4	103188709	T	C	0.083863	0.052563	0.008988	0.000436964	0.999997
CD	rs153146	5	141394714	A	G	0.271518	-0.015212	0.006471	0.000108111	0.934791
CD	rs755374	5	158829294	T	C	0.332598	0.049654	0.005638	0.00110867	1
CD	rs148844907	6	31628397	A	T	0.0138	0.171137	0.022976	0.000811565	1
CD	rs145568234	6	32247045	G	T	0.005712	0.30226	0.036795	0.00105314	1
CD	rs1738074	6	159465977	T	C	0.430352	0.026331	0.008724	0.00037726	0.955102
CD	rs28510097	8	126541090	C	G	0.375893	-0.032534	0.00543	0.000510447	0.999752
CD	rs2393904	10	64379326	T	C	0.30923	-0.020501	0.007588	0.000204156	0.954363
CD	rs10748781	10	101283330	C	A	0.429897	0.04342	0.005015	0.000936467	1
CD	rs61893460	11	76291154	A	G	0.446125	0.045162	0.006073	0.00102621	1
CD	rs11564249	12	40820403	T	C	0.022459	0.127226	0.016252	0.000722318	1
CD	rs3764147	13	44457925	G	A	0.233221	0.031364	0.011908	0.000402545	0.911253
CD	rs28667727	14	88471141	C	T	0.086849	0.049906	0.015348	0.000432414	0.945822
CD	rs146528649	16	50660964	T	G	0.016552	0.170615	0.029234	0.00097552	0.999999
CD	rs2066844	16	50745926	T	C	0.055173	0.098122	0.017334	0.00103513	1
CD	rs2066845	16	50756540	C	G	0.016422	0.165792	0.032675	0.000922462	1
CD	rs5743289	16	50756774	T	C	0.173374	0.064062	0.009668	0.0012031	1
CD	rs2066847	16	50763778	GC	G	0.0214	0.11558	0.033777	0.000607303	0.962792
CD	rs72798422	16	50866917	C	T	0.036999	0.1224	0.01414	0.00108185	1
CD	rs80262450	18	12818922	A	G	0.110736	0.060756	0.007178	0.000737134	1
CD	rs7240004	18	46395022	G	A	0.365572	-0.014542	0.005522	0.00011224	0.938066
CD	rs34536443	19	10463118	C	G	0.0473	-0.05303	0.01699	0.000279461	0.981877
CD	rs4821544	22	37258503	C	T	0.313125	0.023	0.005316	0.000239705	0.999648
