# Supplementary material for: Genome-wide fine-mapping improves identification of causal variants
Source: Research Square preprint supplement (doi:10.21203/rs.3.rs-4759390/v1), 2024-08-07
Supplement: Supplementary file 2 [file 6c202e3f75ba29870bf9130e.docx]

**Supplementary Online Material**

**Genome-wide fine-mapping improves identification of causal variants**

- Wu *et al.*

**Contents**

**Figure S1 to S12**

**Supplementary Table 1-2**

**Figure S1** Comparison of true discovery rate in local credible set (LCS) detection between SBayesRC and SuSiE-inf. Shown in panels (a-c) are true discovery rate comparison between SBayesRC and SuSiE-inf at the same alpha cutoff. Results showed in each column correspond to the simulation under sparse model (a), major gene model (b) and LDMS model (c).

**Figure S2** Genome-wide credible set calibration of GBMM under simulations with various genetic architectures. Panels (a-c) show the relationship between true positive rate and credible set cut off value (i.e., alpha). Panels (d-f) further show the relationship between the estimated power and observed power at a wide range of PIP cutoff. Panels (g-i) show the relationship between estimated variance explained from GBMM and observed variance explained. Results showed in each column correspond to simulation under sparse model (a, d and g), large effects model (b, e and h) and LDMS model (c, f and i), respectively.

**Figure S3** Comparison of different Bayesian methods on distance between the causal variants and identified SNPs using the same either genome-wide or block-wise analysis.

**Figure S4** Replication rate of discovery using different Bayesian fine-mapping methods at a given PIP threshold in the replication sample (x-axis) using simulations under sparse model (a; **Methods**), and using real data analysis for height in the UKB (b).

**Figure S5** Comparison oftrans-ancestry prediction accuracy using fine-mapped variants from SBayesRC and SuSiE-inf from the analysis of samples of European ancestry for 6 complex traits in the UK Biobank, with variants identified in credible sets.

**Figure S6** The relationship between the number of fine-mapped variants and the number of identified GWAS loci using LD clumping for 48 complex traits.

**Figure S7** Distribution of the number of fine-mapped SNPs using SBayesRC for 48 complex traits.

**Figure S8** The relationship between the level of pleiotropy (x-axis) and minor allele frequency for fine-mapped SNPs.

**Figure S9** Prioritizing the causal variants at the *FTO* locus for BMI. The top track shows the *FTO* locus plot of the standard GWAS for BMI, and the second to fourth track shows the similar plot but with the PIP from SuSiE-inf, SBayesR and SBayesRC for BMI, respectively. The starred SNP is the known causal variant (rs1421085) for obesity at the FTO locus supported by previous functional studies. Both the known causal variant and secondary signal (rs76488452) identified by SBayesRC at the locus were included in the local credible sets for SuSiE-inf and SBayesR.

**Figure S10** Prioritized missense variants using SBayesRC fine-mapping analysis for schizophrenia. Panels (a-c) shows the locus plot at the *SECISBP2L*, *PPP1R26* and *ZDHHC17* locus for schizophrenia, respectively. The top track shows the locus plot of the standard GWAS for schizophrenia, and the bottom track shows the similar plot but with the PIP from SBayesRC for schizophrenia. The starred SNP is the fine-mapped missense variant (i.e., rs11854184, rs2078266 and rs33996476) at each locus, respectively. Panel d shows the heritability enrichment for 8 functional annotations with three fine-mapped missense variants for schizophrenia. The annotations on the x-axis were those present at least once in these three variants, excluding quantitative annotations and duplicated annotations with flanking windows.

**Figure S11** Bulk tissue gene expression for *SECISBP2L* across samples in 49 GTEx tissues.

**Figure S12** Prioritized missense variants using SBayesRC fine-mapping analysis for Crohn’s disease. Panels (a-d) shows the locus plot at the *LACC1*, *CPR35*, *MAN2B2* and *SLAMF8* locus for Crohn’s disease, respectively. The top track shows the locus plot of the standard GWAS for Crohn’s disease, and the bottom track shows the similar plot but with the PIP from SBayesRC for Crohn’s disease. The starred SNP is the fine-mapped missense variant (i.e., rs3764147, rs3749171, rs61733402 and rs34687326) at each locus, respectively.

**Table S1** Summary of Bayesian fine-mapping methods used in this study

| **Method** | **Scope** | **Model** | **Algorithm** | **Max no. causals** | **Reference** |
| --- | --- | --- | --- | --- | --- |
| SuSiE | Local | Point-normal mixture | Variational Bayes (VB) | 10 | Wang et al., 2020, J. R. Stat. |
| FINEMAP | Local | Point-normal mixture | Shotgun stochastic search (SSS) | 10 | Benner et al., 2016, Bioinform. |
| SuSiE-inf | Local | Point-normal mixture + polygenic effect | VB | 5 | Cui et al., 2023, Nat. Genet. |
| FINEMAP-inf | Local | Point-normal mixture + polygenic effect | SSS | 5 | Cui et al., 2023, Nat. Genet. |
| SBayesC | Genome-wide | Point-normal mixture | MCMC | Unlimited | Lloyd-Jones et al., 2019, Nat. Comm. |
| SBayesRC | Genome-wide | Multi-normal mixture | MCMC | Unlimited | Zheng et al., 2024, Nat. Genet. |

**Table S2** Summary of acronym used in the manuscript

| **Acronym** | **Full name** |
| --- | --- |
| GWFM | Genome-wide fine-mapping |
| GWAS | Genome-wide association studies |
| LD | Linkage disequilibrium |
| COJO | Conditional and joint analysis |
| BMM | Bayesian mixture model |
| GBMM | Genome-wide Bayesian mixture model |
| PIP | Posterior inclusion probability |
| FDR | False discovery rate |
| TDR | True discovery rate |
| TPR | True positive rate |
| MCMC | Markov chain Monte Carlo |
| CS | Credible sets |
| LCS | Local credible sets |
| GCS | Global credible sets |
| UKB | UK Biobank |
| PEP | Posterior enrichment probability |
| MAF | Minor allele frequency |
| LDMS | LD-and-MAF-stratified |
| PGS | Polygenic scores |
| PHE | Proportion of explained by these variants |
| BMI | Body mass index |
| BFP | Body fat percentage |
| HC | Hip circumference |
| WC | Waist circumference |
| ImpLegR | Impedance of leg |
| HDL | High density lipoprotein |
| SCZ | schizophrenia |
| CD | Crohn’s disease |
