# Supplementary material for: Genome-wide fine-mapping improves identification of causal variants
Source: Research Square preprint supplement (doi:10.21203/rs.3.rs-4759390/v1), 2024-08-07
Supplement: Supplementary file 3 [file 72590ea16fd63264d0c5825a.xlsx]

## Sheet: Sheet1
Supplementary Table 3 summary of the genetic architechture estimates for 600 complex traits
Phenotype	Description	pi0	pi1	pi2	pi3	pi4	varExp1	varExp2	varExp3	varExp4	h2_liability	h2_liability_se	n_controls	n_cases	n
100001_irnt	Food weight	0.993443	0.00643707	0.000119192	6.90006e-07	3.59737e-08	0.83507	0.153056	0.008912	0.002952	0.0688175	0.0168566	NA	NA	51453
100002_irnt	Energy	0.993442	0.00644485	0.000112932	6.58625e-07	1.03329e-08	0.845272	0.146591	0.007323	0.000804	0.064783	0.0157844	NA	NA	51453
100010	Portion size	0.993177	0.0067462	7.51379e-05	1.56907e-06	1.14044e-07	0.877049	0.095434	0.016768	0.010738	0.0689896	0.0151841	NA	NA	51427
100011_irnt	Iron	0.992989	0.00694026	6.8828e-05	1.58016e-06	4.20969e-09	0.894552	0.087304	0.01804	9.3e-05	0.067159	0.0152131	NA	NA	51453
100016_irnt	Potassium	0.993134	0.00679541	6.76524e-05	2.59125e-06	2.94678e-08	0.881253	0.086578	0.031378	0.00078	0.0626628	0.0154328	NA	NA	51453
100017_irnt	Magnesium	0.993042	0.00688645	7.00526e-05	1.30079e-06	3.86526e-08	0.894272	0.089889	0.013648	0.002179	0.0734524	0.0166816	NA	NA	51453
102_irnt	Pulse rate, automated reading	0.995341	0.00444695	0.00019867	1.36777e-05	4.36277e-08	0.576159	0.253618	0.168587	0.001632	0.157095	0.0103173	NA	NA	340162
1050	Time spend outdoors in summer	0.994285	0.00548499	0.000229364	3.0769e-07	0	0.711008	0.287115	0.001871	0	0.0682825	0.00369296	NA	NA	327717
1060	Time spent outdoors in winter	0.993605	0.00625346	0.000140204	1.01874e-06	1.30118e-08	0.810434	0.179731	0.009671	0.000156	0.0438698	0.00327736	NA	NA	284889
1070	Time spent watching television (TV)	0.993599	0.00624236	0.000158207	1.65709e-07	1.1481e-09	0.811632	0.187836	0.000524	1e-06	0.104794	0.00435861	NA	NA	341859
1080	Time spent using computer	0.993728	0.00610516	0.000166603	3.23381e-07	5.35778e-09	0.793324	0.204815	0.001798	5.5e-05	0.0975827	0.00415583	NA	NA	280750
1090	Time spent driving	0.993591	0.0062652	0.00014358	5.58358e-07	8.80207e-09	0.81086	0.184346	0.004712	7.3e-05	0.0372924	0.00389355	NA	NA	241357
1100	Drive faster than motorway speed limit	0.994008	0.00579715	0.000194324	1.59968e-07	7.65398e-10	0.752434	0.246703	0.000847	9e-06	0.0583029	0.00345695	NA	NA	327192
110001	Invitation to complete online 24-hour recall dietary questionnaire, acceptance	0.993352	0.00653866	0.000108457	1.2476e-06	1.91349e-09	0.848399	0.139585	0.011979	2.6e-05	0.0598053	0.00643371	70065	148169	218234
1130	Hands-free device/speakerphone use with mobile phone in last 3 month	0.993387	0.00652084	8.90724e-05	3.47912e-06	6.58242e-08	0.847314	0.115393	0.035321	0.001963	0.0302253	0.00499654	NA	NA	302733
1140	Difference in mobile phone use compared to two years previously	0.992963	0.00697946	5.55648e-05	1.57787e-06	2.64062e-08	0.907091	0.07123	0.01973	0.001937	0.0144511	0.00243217	NA	NA	298239
1150_1	Usual side of head for mobile phone use: Left	0.993289	0.00661892	9.05829e-05	1.90278e-06	2.25792e-08	0.861206	0.117078	0.020906	0.000799	0.0429451	0.00841935	195207	107802	303009
1150_2	Usual side of head for mobile phone use: Right	0.993339	0.00655048	0.000109226	1.78185e-06	4.97508e-09	0.844367	0.140159	0.015413	5.1e-05	0.0456933	0.00887678	127654	175355	303009
1150_3	Usual side of head for mobile phone use: Equally left and right	0.992938	0.0069349	0.000124935	1.76654e-06	1.66474e-07	0.821623	0.146425	0.020937	0.011005	0.0514016	0.0101258	283157	19852	303009
1160	Sleep duration	0.994192	0.00559288	0.000214202	4.35511e-07	3.82699e-10	0.726179	0.267043	0.006768	4e-06	0.0745057	0.00423656	NA	NA	359020
1170	Getting up in morning	0.994081	0.0057148	0.000203432	8.11322e-07	3.82699e-10	0.740884	0.25154	0.007563	5e-06	0.0685665	0.00362901	NA	NA	360231
1180	Morning/evening person (chronotype)	0.993857	0.00597138	0.000170014	1.23382e-06	3.06159e-09	0.777675	0.210011	0.0123	8e-06	0.118678	0.00540151	NA	NA	322488
1190	Nap during day	0.993941	0.00588462	0.000173684	1.01186e-06	3.09986e-08	0.765986	0.218073	0.014962	0.000971	0.0836946	0.00365692	NA	NA	360855
1200	Sleeplessness / insomnia	0.994032	0.00577165	0.000196328	2.82814e-07	8.80207e-09	0.747888	0.246051	0.005649	0.000405	0.0623926	0.00349382	NA	NA	360738
1210	Snoring	0.994116	0.00567852	0.000205473	3.25294e-07	3.06159e-09	0.73609	0.262069	0.0018	3.4e-05	0.0980101	0.00546605	210664	125656	336320
1220	Daytime dozing / sleeping (narcolepsy)	0.994146	0.00565098	0.000202314	1.00765e-06	3.82699e-10	0.731196	0.256502	0.012294	1e-06	0.0494522	0.0030404	NA	NA	359752
1239	Current tobacco smoking	0.994123	0.00567226	0.00020466	4.7646e-07	4.97508e-09	0.736533	0.260993	0.002329	0.000138	0.0567711	0.00331826	NA	NA	360797
1249	Past tobacco smoking	0.9942	0.00557738	0.000222142	1.50783e-07	1.37772e-08	0.726825	0.271334	0.001536	0.000298	0.0894909	0.00399671	NA	NA	332141
1259	Smoking/smokers in household	0.993412	0.00647558	0.00011174	9.12737e-07	4.20969e-09	0.843182	0.144277	0.012009	0.000523	0.0125702	0.00258727	NA	NA	332573
1269	Exposure to tobacco smoke at home	0.993322	0.0065886	8.72285e-05	2.49175e-06	0	0.8566	0.112933	0.030457	0	0.00977063	0.00240589	NA	NA	326676
1279	Exposure to tobacco smoke outside home	0.993447	0.00642656	0.000126065	7.15647e-07	1.5308e-09	0.832344	0.161758	0.005872	1.7e-05	0.0265639	0.00320252	NA	NA	306191
1289	Cooked vegetable intake	0.993575	0.00627892	0.000145357	3.15727e-07	3.06159e-09	0.812461	0.185663	0.001852	1.3e-05	0.0400189	0.00287647	NA	NA	350404
1299	Salad / raw vegetable intake	0.993934	0.00588919	0.000176357	9.46797e-07	4.97508e-09	0.765597	0.227509	0.006852	3.4e-05	0.0461009	0.00319827	NA	NA	339601
129_irnt	Place of birth in UK - north co-ordinate	0.991297	0.00870142	1.7895e-06	1.26291e-08	0	0.999109	0.000863	8e-06	0	0.0253138	0.00418118	NA	NA	338701
1309	Fresh fruit intake	0.994079	0.00573946	0.000179144	2.17143e-06	1.95176e-08	0.746192	0.229165	0.023919	0.000716	0.060081	0.00336492	NA	NA	348284
1319	Dried fruit intake	0.994168	0.00561828	0.000213799	3.31034e-07	5.35778e-09	0.728186	0.269185	0.002587	3.5e-05	0.0696932	0.00345123	NA	NA	329134
134	Number of self-reported cancers	0.994098	0.00585191	3.69232e-05	1.34121e-05	1.67239e-07	0.756886	0.047239	0.186844	0.009023	0.0103931	0.00252213	NA	NA	361136
135	Number of self-reported non-cancer illnesses	0.994135	0.00565428	0.000209701	6.74315e-07	1.18637e-08	0.732997	0.258676	0.008066	0.000255	0.0636328	0.00304891	NA	NA	361141
136	Number of operations, self-reported	0.99377	0.00606511	0.000164692	1.91732e-07	3.82699e-10	0.787716	0.211107	0.001168	1e-06	0.0429979	0.00303088	NA	NA	361141
137	Number of treatments/medications taken	0.993824	0.00600057	0.000174337	7.04166e-07	6.50588e-09	0.778055	0.213945	0.007917	7.4e-05	0.0686476	0.00316998	NA	NA	361141
1418_1	Milk type used: Full cream	0.993506	0.00637355	0.000119032	1.08151e-06	1.22846e-07	0.826731	0.15397	0.014742	0.004547	0.0507179	0.00928312	337904	22902	360806
1418_2	Milk type used: Semi-skimmed	0.993166	0.00674717	8.57134e-05	9.42205e-07	2.87024e-08	0.876814	0.1106	0.010684	0.001891	0.0269582	0.00372167	125936	234870	360806
1418_3	Milk type used: Skimmed	0.993321	0.00657895	9.77727e-05	1.87676e-06	3.82699e-10	0.852219	0.125753	0.022016	1e-06	0.0485845	0.00489039	286719	74087	360806
1418_4	Milk type used: Soya	0.993415	0.00646886	0.000115343	8.3237e-07	1.14044e-07	0.835346	0.148118	0.009425	0.007101	0.0662468	0.0123125	347659	13147	360806
1418_6	Milk type used: Never/rarely have milk	0.993199	0.0067068	9.39059e-05	5.80937e-07	2.56408e-08	0.867827	0.120836	0.007984	0.003342	0.0937467	0.0149426	349219	11587	360806
1428_0	Spread type: Never/rarely use spread	0.993602	0.00628705	0.00010721	3.91042e-06	1.1481e-09	0.816344	0.138487	0.045104	5.5e-05	0.0734606	0.00729866	323712	36579	360291
1428_1	Spread type: Butter/spreadable butter	0.99389	0.0059409	0.000168297	8.03668e-07	0	0.771624	0.217557	0.010812	0	0.0675873	0.00452692	229101	131190	360291
1428_3	Spread type: Other type of spread/margarine	0.99324	0.00666338	9.60402e-05	8.63369e-07	7.57744e-08	0.864069	0.124573	0.009355	0.001993	0.0453808	0.004002	169698	190593	360291
1438_irnt	Bread intake	0.993803	0.00603408	0.000162026	1.14236e-06	7.27128e-09	0.782722	0.204564	0.012518	0.000189	0.0494496	0.00314299	NA	NA	353030
1448_1	Bread type: White	0.993859	0.0059579	0.000182644	1.93646e-07	7.65398e-10	0.772241	0.226909	0.00084	3e-06	0.114941	0.00593538	256972	91452	348424
1448_3	Bread type: Wholemeal or wholegrain	0.99397	0.00584216	0.000187003	3.76576e-07	1.37772e-08	0.758051	0.238559	0.003195	0.000187	0.0747248	0.00490791	147411	201013	348424
1458	Cereal intake	0.994163	0.0056325	0.000203642	1.30385e-06	1.99003e-08	0.724618	0.25512	0.018986	0.00127	0.0595994	0.00330574	NA	NA	345019
1468_3	Cereal type: Oat cereal (e.g. Ready Brek, porridge)	0.993199	0.00671645	8.31972e-05	1.10256e-06	9.95017e-08	0.874772	0.106817	0.013448	0.004952	0.0299481	0.00524779	223547	76351	299898
1468_4	Cereal type: Muesli	0.993786	0.00604413	0.000170095	2.29619e-07	1.91349e-09	0.783268	0.21514	0.001578	8e-06	0.0982443	0.00616247	238375	61523	299898
1468_5	Cereal type: Other (e.g. Cornflakes, Frosties)	0.99372	0.00613634	0.00014235	1.73095e-06	7.65398e-09	0.796574	0.185175	0.018024	0.000218	0.0742468	0.00654667	241793	58105	299898
1478	Salt added to food	0.993978	0.00584635	0.000174603	1.20856e-06	9.68228e-08	0.760438	0.219183	0.017185	0.003185	0.0808059	0.00397152	NA	NA	360954
1488_irnt	Tea intake	0.99434	0.00544936	0.000209526	5.42284e-07	1.53462e-07	0.705544	0.26759	0.012274	0.014585	0.0544413	0.00432103	NA	NA	349376
1498	Coffee intake	0.994212	0.00564326	0.000141383	2.96132e-06	5.05162e-07	0.72805	0.183168	0.034805	0.05397	0.0477552	0.00511947	NA	NA	334659
1508_1	Coffee type: Decaffeinated coffee (any type)	0.993122	0.00681389	6.20477e-05	1.94717e-06	4.59239e-09	0.893425	0.080808	0.024956	0.0008	0.0364229	0.00591692	228139	55310	283449
1508_2	Coffee type: Instant coffee	0.993461	0.00641562	0.000122541	9.44118e-07	8.41937e-09	0.831041	0.158859	0.00986	0.000232	0.0556215	0.00538634	125063	158386	283449
1508_3	Coffee type: Ground coffee (include espresso, filter etc)	0.993903	0.00591513	0.000182028	2.98122e-07	2.29619e-09	0.768004	0.230555	0.001421	1.2e-05	0.126927	0.00749927	218487	64962	283449
1518	Hot drink temperature	0.99427	0.00549911	0.000229912	6.06195e-07	3.06159e-09	0.714552	0.279672	0.005703	6.7e-05	0.0739381	0.00367748	NA	NA	357256
1528	Water intake	0.993911	0.00591514	0.000173671	2.00917e-07	2.33829e-07	0.764964	0.216882	0.001799	0.016349	0.0653429	0.00367292	NA	NA	333363
1538_0	Major dietary changes in the last 5 years: No	0.994017	0.00579595	0.000186702	7.90273e-07	1.56907e-08	0.75073	0.239423	0.009629	0.00021	0.0710842	0.00432667	138926	221368	360294
1538_1	Major dietary changes in the last 5 years: Yes, because of illness	0.993684	0.00616766	0.000147389	8.22037e-07	2.67889e-08	0.797639	0.19065	0.010836	0.000867	0.0828462	0.00759969	322243	38051	360294
1538_2	Major dietary changes in the last 5 years: Yes, because of other reasons	0.993249	0.00668279	6.43053e-05	3.81245e-06	3.82699e-10	0.869644	0.083638	0.046706	1e-06	0.0416183	0.00400441	259419	100875	360294
1548	Variation in diet	0.994159	0.00563021	0.000210326	2.92765e-07	1.1481e-09	0.727984	0.270498	0.001498	1.2e-05	0.0475146	0.00284276	NA	NA	359752
1568	Average weekly red wine intake	0.993962	0.00586029	0.000176942	1.16685e-06	1.87522e-08	0.759326	0.227494	0.012868	0.000305	0.0560276	0.00382732	NA	NA	257773
1578	Average weekly champagne plus white wine intake	0.993643	0.00621533	0.000140399	1.5461e-06	2.67889e-09	0.805996	0.181313	0.012662	1.9e-05	0.0275617	0.00358449	NA	NA	257623
1588	Average weekly beer plus cider intake	0.993933	0.00589524	0.000168709	2.63105e-06	5.35778e-09	0.761645	0.216193	0.022118	3.7e-05	0.0502052	0.00471653	NA	NA	258256
1598	Average weekly spirits intake	0.993452	0.00642824	0.000118839	1.33294e-06	1.5308e-08	0.833276	0.153058	0.013255	0.000402	0.0363481	0.00355776	NA	NA	257426
1618	Alcohol usually taken with meals	0.993869	0.00594593	0.000184803	2.44162e-07	2.29619e-09	0.76869	0.230084	0.001214	5e-06	0.171832	0.0105169	59552	125164	184716
1628	Alcohol intake versus 10 years previously	0.993633	0.0062365	0.00012852	2.20128e-06	3.44429e-09	0.808892	0.167385	0.023645	6.9e-05	0.0311112	0.00279132	NA	NA	334989
1677	Breastfed as a baby	0.993455	0.00641772	0.000126786	5.71369e-07	1.41599e-08	0.83099	0.163009	0.005701	0.000289	0.0392372	0.00605995	79905	193838	273743
1687	Comparative body size at age 10	0.994629	0.00516798	0.00020077	1.66972e-06	6.90771e-07	0.676872	0.256932	0.02588	0.040311	0.141969	0.00912155	NA	NA	354996
1697	Comparative height size at age 10	0.995282	0.00446879	0.000238889	1.0148e-05	3.29121e-08	0.581851	0.310644	0.106784	0.000717	0.248336	0.0120586	NA	NA	355331
1757	Facial ageing	0.99475	0.00501858	0.000229416	1.70186e-06	6.50588e-07	0.627249	0.284046	0.018635	0.070065	0.0788022	0.00431159	NA	NA	330409
1787	Maternal smoking around birth	0.993793	0.00603949	0.000166549	9.91573e-07	6.50588e-09	0.781768	0.210088	0.008073	6.3e-05	0.0851448	0.00575953	214760	95182	309942
1807_irnt	Father age at death	0.993587	0.00628399	0.000127469	1.39609e-06	1.2897e-07	0.814411	0.163139	0.018112	0.004328	0.0326091	0.00458256	NA	NA	266231
1873	Number of full brothers	0.99317	0.00674681	8.19886e-05	8.35049e-07	4.24796e-08	0.881771	0.105288	0.009097	0.003833	0.016178	0.00231759	NA	NA	355326
1883	Number of full sisters	0.993092	0.00683166	7.51464e-05	7.19474e-07	8.49591e-08	0.887732	0.097133	0.007608	0.007516	0.0110558	0.00234029	NA	NA	355390
189_irnt	Townsend deprivation index at recruitment	0.993565	0.00629022	0.000144971	1.14044e-07	3.82699e-10	0.814127	0.185292	0.00057	2e-06	0.0311614	0.00245705	NA	NA	360763
1920	Mood swings	0.994245	0.00553245	0.000222554	2.76309e-07	1.5308e-09	0.720058	0.278602	0.001328	6e-06	0.108192	0.0061498	193622	158982	352604
1930	Miserableness	0.994167	0.00562015	0.000213001	1.50401e-07	1.91349e-09	0.730969	0.26839	0.000632	2e-06	0.10278	0.00779113	203430	151752	355182
1940	Irritability	0.994205	0.00557909	0.000215297	1.40833e-07	4.59239e-09	0.726865	0.272245	0.000829	5.5e-05	0.118245	0.0123898	248369	96862	345231
1950	Sensitivity / hurt feelings	0.994289	0.00548171	0.000229534	1.46191e-07	1.5308e-09	0.712661	0.28652	0.000806	7e-06	0.0950699	0.00704906	156066	194755	350821
1960	Fed-up feelings	0.99398	0.00582414	0.000195581	1.74128e-07	3.06159e-09	0.757079	0.242149	0.000737	2.8e-05	0.109209	0.00693359	210432	143332	353764
1970	Nervous feelings	0.994091	0.0057065	0.000202565	2.67506e-07	2.67889e-09	0.742456	0.25627	0.001247	2.1e-05	0.123377	0.0103603	268709	83120	351829
1980	Worrier / anxious feelings	0.994172	0.00561119	0.000216616	1.6303e-07	1.5308e-09	0.7298	0.269394	0.000796	5e-06	0.127994	0.0125561	152370	199463	351833
1990	Tense / highly strung	0.993878	0.00594591	0.000176369	1.79486e-07	3.82699e-10	0.774885	0.224405	0.000702	1e-06	0.122197	0.0107781	289646	60513	350159
2000	Worry too long after embarrassment	0.994343	0.00542031	0.000236298	2.61766e-07	2.67889e-09	0.702725	0.295364	0.001873	3.1e-05	0.0986832	0.00700968	181217	165310	346527
20002_1065	Non-cancer illness code, self-reported: hypertension	0.99473	0.00504117	0.000224129	4.33368e-06	3.09986e-08	0.65816	0.292157	0.048926	0.000752	0.238336	0.0104196	267581	93560	361141
20002_1074	Non-cancer illness code, self-reported: angina	0.99404	0.00584863	0.000104057	6.97469e-06	5.19705e-07	0.757623	0.136292	0.076271	0.029806	0.162362	0.0182075	349771	11370	361141
20002_1111	Non-cancer illness code, self-reported: asthma	0.995665	0.00410628	0.00021631	1.23738e-05	6.00837e-08	0.539991	0.290726	0.167735	0.001545	0.170462	0.0136125	319207	41934	361141
20002_1138	Non-cancer illness code, self-reported: gastro-oesophageal reflux (gord) / gastric reflux	0.993181	0.00674875	6.75019e-05	3.16301e-06	1.45426e-08	0.877039	0.086097	0.036286	0.000568	0.0593549	0.0118226	345931	15210	361141
20002_1220	Non-cancer illness code, self-reported: diabetes	0.994975	0.00484591	0.000167071	1.15246e-05	1.96707e-07	0.618217	0.217321	0.14361	0.020847	0.1865	0.0156862	347027	14114	361141
20002_1286	Non-cancer illness code, self-reported: depression	0.99306	0.00687183	6.6208e-05	1.54151e-06	6.96512e-08	0.893705	0.085728	0.016074	0.004482	0.0759891	0.0104281	340493	20648	361141
20002_1387	Non-cancer illness code, self-reported: hayfever/allergic rhinitis	0.994497	0.0054299	5.39567e-05	1.93095e-05	8.80207e-09	0.702818	0.070425	0.22648	0.00027	0.0885991	0.0125005	340474	20667	361141
20002_1465	Non-cancer illness code, self-reported: osteoarthritis	0.993589	0.0062857	0.000121964	2.85455e-06	6.12318e-09	0.813512	0.157798	0.028588	9.3e-05	0.0713755	0.00844262	331095	30046	361141
20002_1473	Non-cancer illness code, self-reported: high cholesterol	0.99543	0.00445211	0.000103634	1.29911e-05	1.17986e-06	0.566705	0.13435	0.167372	0.131569	0.125653	0.0121892	317184	43957	361141
20003_1140860806	Treatment/medication code: ramipril	0.993787	0.00608439	0.00012361	4.53154e-06	3.82699e-10	0.788594	0.160585	0.050812	0	0.0860908	0.0118081	344272	16869	361141
20003_1140861958	Treatment/medication code: simvastatin	0.994235	0.00567379	7.88513e-05	1.24802e-05	6.16145e-08	0.734953	0.104365	0.155343	0.005333	0.0907778	0.00776048	320220	40921	361141
20003_1140861998	Treatment/medication code: ventolin 100micrograms inhaler	0.994448	0.00546729	6.96952e-05	1.48457e-05	2.70951e-07	0.712529	0.091454	0.181324	0.014686	0.118218	0.0171268	350761	10380	361141
20003_1140864752	Treatment/medication code: lansoprazole	0.993196	0.00671261	9.10169e-05	6.40638e-07	7.73052e-08	0.872023	0.117119	0.007223	0.003624	0.068605	0.0128473	348309	12832	361141
20003_1140865634	Treatment/medication code: omeprazole	0.993329	0.00655723	0.000113256	3.92266e-07	4.59239e-09	0.851149	0.144813	0.003776	0.000253	0.0814209	0.00933092	340022	21119	361141
20003_1140866738	Treatment/medication code: atenolol	0.993866	0.00601807	0.000107831	8.03285e-06	4.97508e-09	0.776982	0.139478	0.083457	7.4e-05	0.0989738	0.0122102	347190	13951	361141
20003_1140868226	Treatment/medication code: aspirin	0.994144	0.00569804	0.000152483	5.19552e-06	2.64062e-08	0.736949	0.198896	0.063694	0.000453	0.0613488	0.00585043	313060	48081	361141
20003_1140871310	Treatment/medication code: ibuprofen	0.993148	0.00676841	8.21838e-05	1.25717e-06	1.18637e-08	0.879151	0.10531	0.015119	0.000409	0.0466789	0.00526136	316136	45005	361141
20003_1140879802	Treatment/medication code: amlodipine	0.994264	0.00561204	0.000111724	1.21243e-05	1.72214e-08	0.72586	0.146828	0.127005	0.000301	0.118078	0.0132211	346553	14588	361141
20003_1141146234	Treatment/medication code: atorvastatin	0.994534	0.00541929	3.18536e-05	1.41916e-05	6.85414e-07	0.699834	0.040642	0.197629	0.06189	0.0907204	0.0161191	350336	10805	361141
20003_1141194794	Treatment/medication code: bendroflumethiazide	0.994396	0.00543122	0.000165742	6.51009e-06	3.1764e-08	0.704501	0.221076	0.07369	0.000728	0.137727	0.0161947	340945	20196	361141
20003_2038460150	Treatment/medication code: paracetamol	0.993877	0.00595347	0.000168538	8.25099e-07	1.95176e-08	0.772089	0.218921	0.008632	0.000349	0.0704395	0.0058154	294794	66347	361141
20015_irnt	Sitting height	0.995048	0.00471203	0.000233494	6.19513e-06	4.86028e-08	0.614339	0.317809	0.066539	0.001308	0.348691	0.0166791	NA	NA	360066
20016_irnt	Fluid intelligence score	0.994146	0.00563835	0.000215309	1.84461e-07	3.82699e-09	0.732824	0.26645	0.000705	1.4e-05	0.222535	0.0115468	NA	NA	117131
20018	Prospective memory result	0.993341	0.0065735	8.24528e-05	3.19974e-06	2.18138e-08	0.854849	0.107847	0.036856	0.00044	0.0489084	0.00771549	NA	NA	119729
20022_irnt	Birth weight	0.995159	0.00458721	0.00024623	7.23454e-06	1.30118e-08	0.594254	0.322108	0.083342	0.000293	0.121532	0.00656741	NA	NA	205475
20023_irnt	Mean time to correctly identify matches	0.994076	0.00571223	0.000211347	6.46761e-08	6.50588e-09	0.739575	0.259773	0.000506	0.000139	0.0782685	0.00352303	NA	NA	358695
20075_irnt	Home location at assessment - north co-ordinate (rounded)	0.991957	0.00803186	1.10412e-05	6.69723e-08	0	0.989559	0.01032	0.000107	0	0.0215307	0.00322284	NA	NA	357793
20077	Number of diet questionnaires completed	0.992912	0.00702223	6.52781e-05	5.19322e-07	7.27128e-09	0.90991	0.084092	0.005772	0.000214	0.0332838	0.00526267	NA	NA	156401
2010	Suffer from nerves	0.993951	0.00586648	0.000182027	3.77341e-07	1.91349e-09	0.760854	0.235629	0.003482	2.7e-05	0.088436	0.00884548	274144	73938	348082
20107_1	Illnesses of father: Heart disease	0.994476	0.00538924	0.000124265	1.04967e-05	1.16723e-07	0.701115	0.164109	0.128207	0.006563	0.0557814	0.00517978	214460	104110	318570
20107_100	Illnesses of father: None of the above (group 1)	0.993631	0.0062662	9.77306e-05	4.69839e-06	1.49253e-08	0.811094	0.12504	0.063544	0.000314	0.0256542	0.00416402	198061	116736	314797
20107_101	Illnesses of father: None of the above (group 2)	0.993355	0.00656792	7.36286e-05	3.87597e-06	4.47758e-08	0.850493	0.094565	0.053535	0.001398	0.0192442	0.00445249	80871	237674	318545
20107_13	Illnesses of father: Prostate cancer	0.993921	0.00602854	4.20812e-05	7.26745e-06	8.33901e-07	0.786181	0.053739	0.10453	0.055542	0.0386236	0.00871167	288337	24207	312544
20107_3	Illnesses of father: Lung cancer	0.993344	0.00658569	6.94158e-05	1.91349e-09	8.12087e-07	0.859682	0.089848	1.3e-05	0.050447	0.0461308	0.00982561	284866	29206	314072
20107_6	Illnesses of father: Chronic bronchitis/emphysema	0.993302	0.0066287	6.57293e-05	3.87559e-06	5.66394e-08	0.859274	0.084416	0.052235	0.004064	0.032525	0.00747586	278554	36126	314680
20107_8	Illnesses of father: High blood pressure	0.994036	0.0058247	0.000132549	6.80592e-06	9.95017e-09	0.75185	0.171377	0.076593	0.000173	0.0419815	0.00495961	243885	71136	315021
20107_9	Illnesses of father: Diabetes	0.994135	0.00575492	0.000102166	7.1779e-06	3.47108e-07	0.744754	0.132986	0.083848	0.038405	0.061659	0.00852271	283284	30010	313294
20110_1	Illnesses of mother: Heart disease	0.993707	0.00622094	6.50366e-05	7.02444e-06	7.27128e-09	0.806909	0.084418	0.107632	0.001032	0.0324148	0.00555403	266623	66343	332966
20110_100	Illnesses of mother: None of the above (group 1)	0.99362	0.00629304	8.10376e-05	6.34362e-06	8.41937e-09	0.817171	0.104955	0.077495	0.000369	0.0297377	0.00400578	194320	138291	332611
20110_6	Illnesses of mother: Chronic bronchitis/emphysema	0.993535	0.00636468	9.70406e-05	3.62875e-06	7.65398e-10	0.826082	0.125612	0.048282	1.6e-05	0.0611947	0.0109769	311371	19637	331008
20110_8	Illnesses of mother: High blood pressure	0.993919	0.00594052	0.000135175	5.17868e-06	3.1764e-08	0.768692	0.174958	0.055945	0.000397	0.0490685	0.00502627	231360	101688	333048
20110_9	Illnesses of mother: Diabetes	0.994103	0.00581633	6.94334e-05	1.11694e-05	4.07574e-07	0.752434	0.090255	0.120515	0.036789	0.0726155	0.00792475	300370	30772	331142
20111_1	Illnesses of siblings: Heart disease	0.993706	0.00620458	8.371e-05	5.55066e-06	3.45577e-07	0.804895	0.107868	0.066392	0.020835	0.0664214	0.00872203	252088	28696	280784
20111_100	Illnesses of siblings: None of the above (group 1)	0.994031	0.00577973	0.000188561	9.15033e-07	1.49253e-08	0.747459	0.243874	0.008355	0.000304	0.064885	0.00507752	91010	190969	281979
20111_12	Illnesses of siblings: Severe depression	0.993088	0.00684572	6.44901e-05	2.23152e-06	2.71716e-08	0.890733	0.082733	0.025117	0.001406	0.0535306	0.0100454	259751	20107	279858
20111_8	Illnesses of siblings: High blood pressure	0.994084	0.00576689	0.000143193	6.04702e-06	1.07156e-07	0.74623	0.185322	0.065612	0.002828	0.0759599	0.00706505	223124	58495	281619
20111_9	Illnesses of siblings: Diabetes	0.993869	0.00604054	8.36702e-05	5.63907e-06	6.80056e-07	0.771689	0.106908	0.065599	0.055797	0.0882045	0.0100444	256765	23446	280211
20116_0	Smoking status: Never	0.993899	0.00591389	0.000186663	2.69037e-07	1.91349e-09	0.772375	0.225858	0.001755	4e-06	0.150977	0.00597669	164638	195068	359706
20116_1	Smoking status: Previous	0.994074	0.00572386	0.000201649	2.19669e-07	5.47259e-08	0.741811	0.254869	0.00193	0.001383	0.0812787	0.00489905	232156	127550	359706
20116_2	Smoking status: Current	0.994205	0.00558348	0.000211361	5.86295e-07	1.87522e-08	0.724593	0.267332	0.007551	0.000516	0.152086	0.00888694	322618	37088	359706
20117_0	Alcohol drinker status: Never	0.992982	0.00695063	6.73003e-05	0	2.72482e-07	0.899505	0.08635	0	0.014133	0.0845979	0.0136704	349483	11243	360726
20117_1	Alcohol drinker status: Previous	0.993237	0.00666617	9.66617e-05	5.84764e-07	6.00837e-08	0.862242	0.124567	0.00742	0.005762	0.0781174	0.0139403	348162	12564	360726
20117_2	Alcohol drinker status: Current	0.993583	0.0062779	0.000137755	1.06658e-06	1.56907e-08	0.812368	0.177663	0.009742	0.000217	0.0765176	0.0100195	23807	336919	360726
20118_11	Home area population density - urban or rural: Scotland - Large Urban Area	0.993453	0.00633435	0.000213056	7.42436e-08	0	0.784296	0.21556	0.000135	0	0.0460236	0.0110472	336781	20931	357712
20126_0	Bipolar and major depression status: No Bipolar or Depression	0.99327	0.00662842	0.000100546	5.42284e-07	3.52083e-08	0.862706	0.129251	0.006556	0.001477	0.101149	0.0169252	24070	62825	86895
20127_irnt	Neuroticism score	0.994014	0.00578501	0.000200881	4.28623e-08	0	0.755652	0.244223	0.000118	0	0.11191	0.00825267	NA	NA	293006
20128	Number of fluid intelligence questions attempted within time limit	0.993584	0.00627702	0.000138266	5.23149e-07	7.65398e-09	0.816432	0.179246	0.004226	8.7e-05	0.08132	0.00803377	NA	NA	117131
20150_irnt	Forced expiratory volume in 1-second (FEV1), Best measure	0.99406	0.00576323	0.000175348	1.55223e-06	2.94678e-08	0.759093	0.225904	0.014541	0.000456	0.212896	0.00855237	NA	NA	272338
20151_irnt	Forced vital capacity (FVC), Best measure	0.994152	0.00566754	0.000177572	2.6368e-06	2.52581e-08	0.745359	0.228025	0.026235	0.000374	0.236934	0.00930163	NA	NA	272338
20152	Reproduciblity of spirometry measurement using ERS/ATS criteria	0.993041	0.00687738	8.03874e-05	8.37345e-07	1.10983e-08	0.888333	0.10235	0.008707	0.000599	0.0257082	0.00594371	59808	212530	272338
20153_irnt	Forced expiratory volume in 1-second (FEV1), predicted	0.995584	0.00412489	0.000281823	8.88703e-06	3.82699e-08	0.535995	0.367932	0.095304	0.000766	0.43327	0.0237085	NA	NA	117241
20154_irnt	Forced expiratory volume in 1-second (FEV1), predicted percentage	0.994677	0.0050609	0.000261462	7.742e-07	7.65398e-09	0.659031	0.332901	0.007802	0.000261	0.205501	0.0117808	NA	NA	117241
20160	Ever smoked	0.994153	0.00563491	0.000212078	3.25294e-07	1.56907e-08	0.734331	0.261488	0.003742	0.000432	0.119729	0.0055524	141560	218191	359751
2020	Loneliness, isolation	0.993832	0.00599443	0.000173085	3.40602e-07	8.03668e-09	0.77671	0.221224	0.001981	7.6e-05	0.0815308	0.00594766	292075	63508	355583
2030	Guilty feelings	0.993932	0.00588893	0.000178685	5.62185e-07	6.50588e-09	0.766526	0.229651	0.003774	4.1e-05	0.0949556	0.00654802	251779	100128	351907
2040	Risk taking	0.994139	0.00565213	0.000208301	3.96093e-07	9.95017e-09	0.732101	0.265194	0.002558	0.000139	0.0914498	0.00598149	258049	90500	348549
20421	Ever felt worried, tense, or anxious for most of a month or longer	0.993262	0.00665151	8.37965e-05	2.32375e-06	3.52083e-08	0.864721	0.108321	0.025346	0.001601	0.0985887	0.0136715	80964	29351	110315
20425	Ever worried more than most people would in similar situation	0.993242	0.00666301	9.39686e-05	1.31113e-06	5.74048e-09	0.865543	0.120553	0.013106	0.000787	0.100471	0.0212071	73367	25623	98990
20441	Ever had prolonged loss of interest in normal activities	0.993128	0.00678793	8.29044e-05	9.85449e-07	2.67889e-09	0.88378	0.106739	0.009438	3.2e-05	0.0948197	0.0125246	71397	46330	117727
20446	Ever had prolonged feelings of sadness or depression	0.993199	0.00670316	9.70302e-05	4.02982e-07	9.95017e-09	0.871655	0.124672	0.003547	0.000116	0.0950192	0.0110659	53389	64374	117763
20458	General happiness	0.993291	0.00659819	0.000110648	1.91349e-07	7.27128e-09	0.856541	0.141535	0.001753	0.00016	0.0552333	0.00673078	NA	NA	117442
20459	General happiness with own health	0.993536	0.00632953	0.000132959	1.02219e-06	3.06159e-09	0.81943	0.171981	0.008549	2.9e-05	0.0724561	0.00718831	NA	NA	117753
20460	Belief that own life is meaningful	0.993374	0.00650933	0.000116263	5.25828e-07	4.97508e-09	0.845376	0.149278	0.005283	5.2e-05	0.0616486	0.00718833	NA	NA	115352
20479	Ever thought that life not worth living	0.993787	0.00605217	0.000160468	5.52617e-07	5.35778e-09	0.786445	0.208946	0.004548	5.3e-05	0.0693114	0.00779349	NA	NA	117291
20485	Ever contemplated self-harm	0.993355	0.00652833	0.000116191	4.37807e-07	1.1481e-09	0.846519	0.149062	0.00439	1.9e-05	0.03457	0.00711431	NA	NA	117610
20487	Felt hated by family member as a child	0.993274	0.00662482	0.000100447	5.72517e-07	9.26131e-08	0.859217	0.1299	0.006452	0.00442	0.0535884	0.00655517	NA	NA	117749
20488	Physically abused by family as a child	0.993203	0.00669692	9.94558e-05	3.9418e-07	4.97508e-09	0.868025	0.128275	0.003618	7.2e-05	0.0651495	0.00799198	NA	NA	117838
20489	Felt loved as a child	0.99337	0.00651102	0.000118106	4.45461e-07	6.12318e-09	0.845116	0.151498	0.003293	8.3e-05	0.0830749	0.00707196	NA	NA	117624
20491	Someone to take to doctor when needed as a child	0.993534	0.00636974	9.28837e-05	3.64253e-06	8.87861e-08	0.827051	0.119846	0.047256	0.005838	0.0316404	0.00652261	NA	NA	117301
20495	Avoided activities or situations because of previous stressful experience in past month	0.993198	0.00670856	9.23288e-05	6.96512e-07	7.65398e-09	0.873349	0.118317	0.007972	0.000352	0.0344518	0.00708047	NA	NA	117868
20497	Repeated disturbing thoughts of stressful experience in past month	0.993056	0.00686407	7.96312e-05	4.50054e-07	3.82699e-09	0.891296	0.102832	0.005571	0.000289	0.0442656	0.0065773	NA	NA	117900
20498	Felt very upset when reminded of stressful experience in past month	0.993503	0.00638208	0.000112522	2.00802e-06	4.43931e-08	0.830099	0.145389	0.023121	0.001381	0.0554571	0.00760232	NA	NA	117893
20499	Ever sought or received professional help for mental distress	0.993629	0.00622678	0.000143837	2.25792e-07	2.67889e-09	0.809619	0.187328	0.00297	7.5e-05	0.100028	0.0122932	71657	46020	117677
2050	Frequency of depressed mood in last 2 weeks	0.993956	0.00585968	0.000183555	3.62416e-07	1.91349e-09	0.760953	0.236812	0.002221	6e-06	0.0410244	0.00327439	NA	NA	345957
20500	Ever suffered mental distress preventing usual activities	0.993148	0.00676369	8.7868e-05	5.54531e-07	1.45426e-08	0.878729	0.114502	0.006381	0.000378	0.0871472	0.0119767	77846	38681	116527
20502	Ever had period extreme irritability	0.993272	0.00663575	9.13617e-05	8.4653e-07	4.01834e-08	0.868334	0.11812	0.009782	0.003753	0.110885	0.0130935	84675	29747	114422
20505	Recent easy annoyance or irritability	0.993104	0.00681714	7.76228e-05	1.075e-06	1.87522e-08	0.88633	0.100684	0.01223	0.000744	0.0428923	0.00678388	NA	NA	117483
20509	Recent inability to stop or control worrying	0.99319	0.00673618	7.18398e-05	2.1588e-06	3.78872e-08	0.877629	0.093422	0.0275	0.001438	0.0381582	0.00694199	NA	NA	117583
20510	Recent feelings of depression	0.993368	0.00655058	8.03809e-05	8.42703e-07	3.19936e-07	0.852006	0.104701	0.010439	0.032844	0.0376669	0.00647476	NA	NA	117656
20511	Recent poor appetite or overeating	0.99332	0.00659074	8.80487e-05	8.6069e-07	6.81204e-08	0.86706	0.113974	0.010932	0.008024	0.0493221	0.00739607	NA	NA	117907
20512	Recent feelings of foreboding	0.993252	0.00667905	6.65697e-05	2.19784e-06	2.5947e-07	0.866641	0.085167	0.028466	0.019716	0.0312227	0.00685971	NA	NA	117474
20514	Recent lack of interest or pleasure in doing things	0.992961	0.00698718	5.0388e-05	1.75391e-06	1.00267e-07	0.908719	0.065262	0.019401	0.006606	0.0327978	0.00710667	NA	NA	117757
20517	Trouble falling or staying asleep, or sleeping too much	0.993208	0.00669646	9.46644e-05	1.22004e-06	9.95017e-09	0.86502	0.122269	0.012441	0.000258	0.0580777	0.00728461	NA	NA	117822
20518	Recent changes in speed/amount of moving or speaking	0.994128	0.00580474	5.51492e-05	1.12632e-05	3.81551e-07	0.752552	0.070547	0.149368	0.027526	0.0305051	0.00680125	NA	NA	117868
20519	Recent feelings of tiredness or low energy	0.993699	0.00615006	0.000149929	1.09643e-06	2.67889e-09	0.796823	0.193089	0.010025	5.5e-05	0.0560505	0.00720843	NA	NA	117828
20520	Recent worrying too much about different things	0.993313	0.00657921	0.000106935	6.59007e-07	4.24796e-08	0.852021	0.137102	0.007881	0.002986	0.0358328	0.00747576	NA	NA	117567
20521	Belittlement by partner or ex-partner as an adult	0.993161	0.00675455	8.32335e-05	6.9766e-07	2.29619e-08	0.881079	0.107795	0.009066	0.00205	0.0399766	0.00684816	NA	NA	117741
20522	Been in a confiding relationship as an adult	0.9933	0.00661019	8.72527e-05	2.29122e-06	2.33446e-08	0.856639	0.11245	0.026949	0.003951	0.03196	0.00724112	NA	NA	115099
20523	Physical violence by partner or ex-partner as an adult	0.993204	0.00671789	7.57514e-05	2.21276e-06	2.64062e-08	0.871456	0.096809	0.028854	0.00287	0.032446	0.00710914	NA	NA	117746
20529	Victim of physically violent crime	0.993204	0.0067164	7.81601e-05	1.7497e-06	3.98007e-08	0.873445	0.100814	0.021117	0.004614	0.0697267	0.0145629	95920	21926	117846
20536_0	Weight change during worst episode of depression: Stayed about the same or was on a diet	0.993081	0.00682259	9.33192e-05	2.54456e-06	5.2047e-08	0.847549	0.115869	0.030361	0.006209	0.0842026	0.0200412	33590	22981	56571
20544_11	Mental health problems ever diagnosed by a professional: Depression	0.993453	0.00643277	0.000112796	1.48793e-06	7.99841e-08	0.832434	0.144946	0.017797	0.004814	0.0845953	0.0149154	92695	25087	117782
20544_15	Mental health problems ever diagnosed by a professional: Anxiety, nerves or generalized anxiety disorder	0.993477	0.00641368	0.000107745	1.44239e-06	1.1481e-07	0.833625	0.138773	0.018962	0.00863	0.0808693	0.0160484	101021	16730	117751
20546_3	Substances taken for depression: Medication prescribed to you (for at least two weeks)	0.993223	0.0066841	9.21699e-05	9.27662e-07	2.75543e-08	0.868289	0.1187	0.009602	0.003398	0.0938686	0.0130962	89412	28351	117763
20547_1	Activities undertaken to treat depression: Talking therapies, such as psychotherapy, counselling, group therapy or CBT	0.993226	0.00669538	7.62849e-05	2.66167e-06	3.82699e-10	0.867449	0.098454	0.034037	5e-05	0.0936898	0.0133139	91803	25960	117763
20548_2	Manifestations of mania or irritability: I was more restless than usual	0.993059	0.00685752	8.27984e-05	2.91234e-07	6.88858e-09	0.890431	0.105387	0.003135	0.001036	0.0816765	0.0192232	101546	12876	114422
20550_1	Activities undertaken to treat anxiety: Talking therapies, such as psychotherapy, counselling, group therapy or CBT	0.993299	0.00660926	8.99935e-05	1.14503e-06	2.15842e-07	0.858614	0.115218	0.014067	0.012091	0.0800626	0.0190146	86132	12858	98990
2060	Frequency of unenthusiasm / disinterest in last 2 weeks	0.993392	0.00648783	0.000119407	3.31034e-07	5.74048e-09	0.843337	0.153936	0.002659	5.8e-05	0.0367568	0.00280848	NA	NA	349631
2070	Frequency of tenseness / restlessness in last 2 weeks	0.994217	0.00556487	0.000218377	1.39685e-07	2.67889e-09	0.721088	0.278239	0.000649	1.7e-05	0.0403121	0.00287385	NA	NA	347965
2080	Frequency of tiredness / lethargy in last 2 weeks	0.993786	0.00604328	0.000170838	4.3245e-08	0	0.785109	0.21466	0.000223	0	0.0605912	0.00317312	NA	NA	350580
2090	Seen doctor (GP) for nerves, anxiety, tension or depression	0.994006	0.00579523	0.000199017	8.22802e-08	0	0.750928	0.248679	0.000386	0	0.100929	0.00559937	235165	123528	358693
2100	Seen a psychiatrist for nerves, anxiety, tension or depression	0.993974	0.00583901	0.000186636	2.53729e-07	2.29619e-09	0.757572	0.240905	0.001492	2.2e-05	0.0842259	0.00732956	318302	41233	359535
21001_irnt	Body mass index (BMI)	0.993228	0.00669026	8.02317e-05	1.26903e-06	8.80207e-09	0.876711	0.100951	0.021864	0.000463	0.248198	0.00839573	NA	NA	359983
21002_irnt	Weight	0.99361	0.00626682	0.000120378	2.34441e-06	0	0.818913	0.15233	0.028748	0	0.265415	0.00981492	NA	NA	360116
21021_irnt	Pulse wave Arterial Stiffness index	0.993441	0.00647098	8.36821e-05	4.00647e-06	5.93183e-08	0.839242	0.107472	0.050098	0.003178	0.0491637	0.00717283	NA	NA	118469
2129	Answered sexual history questions	0.993679	0.00616967	0.000150681	7.0187e-07	3.82699e-09	0.800119	0.194322	0.005527	2.3e-05	0.0814326	0.00828195	29611	331404	361015
2139_irnt	Age first had sexual intercourse	0.993535	0.00632043	0.000144248	1.93646e-07	1.91349e-09	0.827126	0.171273	0.001559	3.1e-05	0.161397	0.00586427	NA	NA	317694
2149	Lifetime number of sexual partners	0.994294	0.00547626	0.000229171	1.94411e-07	1.1481e-09	0.712399	0.286696	0.000892	6e-06	0.0766603	0.00429561	NA	NA	296609
2159	Ever had same-sex intercourse	0.993031	0.00690521	6.13604e-05	2.12589e-06	4.28623e-08	0.894456	0.077933	0.0247	0.0029	0.061512	0.013217	315740	11109	326849
2178	Overall health rating	0.993696	0.00613482	0.000169267	8.61072e-08	3.82699e-10	0.799131	0.200613	0.000248	0	0.0989253	0.00380068	NA	NA	359681
2188	Long-standing illness, disability or infirmity	0.994156	0.00563869	0.000204645	9.34168e-07	8.95515e-08	0.726285	0.255487	0.015341	0.00288	0.092582	0.00498569	238000	114798	352798
2207	Wears glasses or contact lenses	0.993328	0.00657807	9.31565e-05	1.5308e-09	4.35894e-07	0.854909	0.120523	3e-05	0.024528	0.0423532	0.00676253	38909	321768	360677
22126	Doctor diagnosed hayfever or allergic rhinitis	0.994356	0.00554344	8.69036e-05	1.37278e-05	4.47758e-08	0.713639	0.111726	0.17326	0.001369	0.176344	0.0246842	70883	20904	91787
22127	Doctor diagnosed asthma	0.994353	0.00556414	6.865e-05	1.44128e-05	7.15647e-08	0.72483	0.089059	0.183496	0.002608	0.143164	0.0284678	80070	11717	91787
2217_irnt	Age started wearing glasses or contact lenses	0.994592	0.0051879	0.000216585	3.55489e-06	9.56747e-09	0.672301	0.274991	0.052507	0.000195	0.0745779	0.00417405	NA	NA	310992
2227	Other eye problems	0.993023	0.00691844	5.67661e-05	1.59777e-06	1.82547e-07	0.89424	0.072486	0.016184	0.017079	0.0238214	0.00496271	308414	51720	360134
2237	Plays computer games	0.993678	0.00615729	0.000164321	9.56747e-08	3.82699e-10	0.798033	0.20166	0.000298	0	0.0690483	0.003787	NA	NA	360817
2247_0	Hearing difficulty/problems: No	0.994243	0.0055943	0.000156107	6.45422e-06	3.90353e-08	0.72743	0.204194	0.067649	0.00072	0.0772598	0.00605873	90797	255838	346635
2247_1	Hearing difficulty/problems: Yes	0.994113	0.00573599	0.000144244	6.34821e-06	4.51585e-08	0.745274	0.187909	0.065355	0.001454	0.0776623	0.00607513	255925	90710	346635
22501_irnt	Year ended full time education	0.994061	0.00574084	0.000198031	2.86641e-07	3.44429e-09	0.743541	0.254112	0.002264	7.5e-05	0.146857	0.0103049	NA	NA	91777
22502	Cough on most days	0.992548	0.00736601	8.47418e-05	6.91537e-07	1.58437e-07	0.882018	0.099733	0.007282	0.010954	0.115353	0.0236955	79194	12593	91787
22506_113	Tobacco smoking: Ex-smoker	0.99345	0.00645584	8.9674e-05	4.01336e-06	1.49253e-08	0.836046	0.115359	0.04835	0.000236	0.13351	0.0174731	58018	33335	91353
22506_114	Tobacco smoking: Never smoked	0.993821	0.00603227	0.000143767	2.87483e-06	7.65398e-10	0.781626	0.185921	0.032435	9e-06	0.157353	0.0181985	36833	54520	91353
2257	Hearing difficulty/problems with background noise	0.99423	0.00555003	0.000219705	1.12896e-07	3.44429e-09	0.719639	0.279877	0.000466	1.2e-05	0.0848941	0.00525155	219842	134141	353983
22606_2	Workplace very noisy: Often	0.993285	0.00660423	0.000110478	5.01718e-07	1.18637e-08	0.853634	0.140972	0.005168	0.000215	0.0835457	0.0165088	73184	17469	90653
22607_0	Workplace very cold: Rarely/never	0.993366	0.00652011	0.000113298	5.15878e-07	3.21467e-08	0.846898	0.145175	0.005939	0.001978	0.0915087	0.0215437	13643	77053	90696
22607_1	Workplace very cold: Sometimes	0.992906	0.00703425	5.77412e-05	1.63106e-06	1.5308e-09	0.909047	0.073362	0.017223	0.000356	0.0795042	0.0143993	47677	42823	90500
22610_1	Workplace full of chemical or other fumes: Sometimes	0.993089	0.00683008	7.99366e-05	7.8415e-07	2.411e-08	0.886359	0.102983	0.009125	0.001522	0.0560552	0.0138082	67351	21709	89060
2267	Use of sun/uv protection	0.994834	0.00500513	0.000157547	1.3161e-06	1.94526e-06	0.588023	0.181251	0.015669	0.215053	0.067196	0.0104741	NA	NA	358559
22704_irnt	Home location - north co-ordinate (rounded)	0.991929	0.00806055	9.93716e-06	3.52083e-08	0	0.99073	0.009172	8.4e-05	0	0.0231302	0.00310924	NA	NA	361187
2277	Frequency of solarium/sunlamp use	0.99327	0.0066353	9.33697e-05	1.49712e-06	1.30118e-08	0.862363	0.120797	0.016415	0.000415	0.0203667	0.00297307	NA	NA	340643
2296	Falls in the last year	0.993365	0.00651934	0.000115388	4.225e-07	5.74048e-09	0.845276	0.151696	0.002983	3.6e-05	0.0311851	0.00249757	NA	NA	360344
2306	Weight change compared with 1 year ago	0.993313	0.00658883	9.72671e-05	6.92685e-07	1.92498e-07	0.850653	0.123489	0.010983	0.014864	0.012919	0.0024366	NA	NA	355129
23098_irnt	Weight	0.993594	0.0062861	0.000117876	2.02907e-06	8.15149e-08	0.821087	0.151043	0.024869	0.002991	0.265599	0.00980517	NA	NA	354838
23099_irnt	Body fat percentage	0.993305	0.0065852	0.000108866	4.58473e-07	1.1481e-09	0.859433	0.134326	0.006227	4e-06	0.229999	0.00682053	NA	NA	354628
23100_irnt	Whole body fat mass	0.993329	0.00657225	9.78791e-05	9.93869e-07	1.5308e-08	0.859616	0.123944	0.01551	0.00092	0.239131	0.00799743	NA	NA	354244
23101_irnt	Whole body fat-free mass	0.994262	0.00555796	0.000174814	4.77799e-06	1.33945e-08	0.722085	0.225208	0.052547	0.000153	0.302503	0.0115528	NA	NA	354808
23102_irnt	Whole body water mass	0.994238	0.0055838	0.000173555	4.4638e-06	2.25792e-08	0.727862	0.222375	0.049207	0.000548	0.302087	0.0115571	NA	NA	354834
23104_irnt	Body mass index (BMI)	0.993282	0.00662876	8.81352e-05	9.21156e-07	1.09452e-07	0.869041	0.111316	0.014935	0.004698	0.24888	0.00837579	NA	NA	354831
23105_irnt	Basal metabolic rate	0.994038	0.00580625	0.000151244	4.11133e-06	6.50588e-09	0.757008	0.197499	0.045381	0.000104	0.296321	0.011322	NA	NA	354825
23106_irnt	Impedance of whole body	0.993753	0.00610299	0.000141701	1.93569e-06	1.37389e-07	0.795555	0.177634	0.021423	0.005378	0.268544	0.0096171	NA	NA	354795
23107_irnt	Impedance of leg (right)	0.993832	0.00601909	0.000146577	1.80863e-06	2.94678e-08	0.787252	0.183863	0.027812	0.001065	0.25101	0.00948887	NA	NA	354817
23108_irnt	Impedance of leg (left)	0.993808	0.0060483	0.000141217	1.95329e-06	7.42436e-08	0.789606	0.177958	0.029258	0.00317	0.252192	0.00954441	NA	NA	354811
23109_irnt	Impedance of arm (right)	0.993811	0.00603329	0.000154318	1.31457e-06	1.1481e-09	0.787992	0.196284	0.015708	8e-06	0.248191	0.00804391	NA	NA	354792
23110_irnt	Impedance of arm (left)	0.993858	0.00598026	0.000159751	1.73209e-06	2.21965e-08	0.780523	0.198721	0.020315	0.000434	0.244367	0.00813786	NA	NA	354807
23111_irnt	Leg fat percentage (right)	0.99316	0.00674742	9.22997e-05	2.67889e-09	1.83695e-07	0.880515	0.113913	1.4e-05	0.005547	0.221416	0.00642216	NA	NA	354811
23112_irnt	Leg fat mass (right)	0.993345	0.0065505	0.000103231	1.12131e-06	0	0.855138	0.128728	0.016124	0	0.23227	0.00763238	NA	NA	354807
23113_irnt	Leg fat-free mass (right)	0.994017	0.00582552	0.000154082	3.64865e-06	2.48754e-08	0.758717	0.196153	0.044764	0.000357	0.282356	0.0108807	NA	NA	354798
23114_irnt	Leg predicted mass (right)	0.994041	0.00579836	0.000156593	3.92458e-06	3.44429e-09	0.755444	0.197913	0.046577	5.8e-05	0.282212	0.0108555	NA	NA	354798
23115_irnt	Leg fat percentage (left)	0.993232	0.0066644	0.000103021	1.56141e-07	1.07538e-07	0.868876	0.125107	0.001869	0.004138	0.221024	0.00639845	NA	NA	354791
23116_irnt	Leg fat mass (left)	0.993385	0.00650497	0.00010866	1.06926e-06	1.08304e-07	0.849066	0.133263	0.013633	0.004027	0.233843	0.00760262	NA	NA	354788
23117_irnt	Leg fat-free mass (left)	0.994004	0.00583969	0.00015259	3.84268e-06	2.94678e-08	0.762289	0.193035	0.044265	0.000402	0.281976	0.0108926	NA	NA	354771
23118_irnt	Leg predicted mass (left)	0.993964	0.00588785	0.000144099	4.08072e-06	8.80207e-09	0.768243	0.183267	0.048281	0.000201	0.281242	0.0108508	NA	NA	354766
23119_irnt	Arm fat percentage (right)	0.99323	0.0066791	9.00827e-05	1.04745e-06	4.97508e-09	0.874282	0.111677	0.01399	4.1e-05	0.222241	0.0069109	NA	NA	354760
23120_irnt	Arm fat mass (right)	0.993372	0.00652922	9.71929e-05	1.04553e-06	9.37612e-08	0.856952	0.123099	0.015478	0.00446	0.231786	0.00810036	NA	NA	354736
23121_irnt	Arm fat-free mass (right)	0.994086	0.00574709	0.0001633	3.17793e-06	1.72214e-08	0.751384	0.214077	0.034386	0.000145	0.27469	0.0101204	NA	NA	354732
23122_irnt	Arm predicted mass (right)	0.994118	0.005714	0.000163422	4.08187e-06	3.82699e-08	0.748344	0.209122	0.041876	0.00065	0.274811	0.0101101	NA	NA	354726
23123_irnt	Arm fat percentage (left)	0.993248	0.00666125	8.99675e-05	9.11589e-07	5.81702e-08	0.87372	0.113446	0.010882	0.001942	0.224839	0.00679203	NA	NA	354707
23124_irnt	Arm fat mass (left)	0.993358	0.00654283	9.82208e-05	1.16685e-06	3.82699e-09	0.857172	0.123416	0.01933	7.3e-05	0.232183	0.00801086	NA	NA	354673
23125_irnt	Arm fat-free mass (left)	0.994057	0.0057823	0.000156313	4.04053e-06	1.45426e-08	0.755897	0.202392	0.041602	0.000101	0.269922	0.0100186	NA	NA	354668
23126_irnt	Arm predicted mass (left)	0.994048	0.00578998	0.000157846	3.73514e-06	2.37273e-08	0.75638	0.203509	0.039583	0.000521	0.269056	0.0100151	NA	NA	354653
23127_irnt	Trunk fat percentage	0.993345	0.00654633	0.000108776	3.6165e-07	1.79868e-08	0.857124	0.137799	0.004599	0.000469	0.220585	0.00676875	NA	NA	354619
23128_irnt	Trunk fat mass	0.993379	0.00651417	0.000105452	1.19746e-06	1.37772e-08	0.851715	0.133787	0.014371	0.000117	0.238672	0.00796105	NA	NA	354597
23129_irnt	Trunk fat-free mass	0.994451	0.00535348	0.000190998	4.94983e-06	5.74048e-08	0.698473	0.246063	0.05434	0.001117	0.298052	0.0114757	NA	NA	354530
23130_irnt	Trunk predicted mass	0.994427	0.00537746	0.000192369	3.57058e-06	5.62567e-08	0.701878	0.254013	0.04305	0.001053	0.296296	0.0114298	NA	NA	354494
2316	Wheeze or whistling in the chest in last year	0.994188	0.00561823	0.000192126	2.1236e-06	1.22464e-08	0.728452	0.242534	0.028773	0.000235	0.128128	0.00695528	280695	73828	354523
2335	Chest pain or discomfort	0.993588	0.00626417	0.000147357	3.01184e-07	2.29619e-09	0.810048	0.188092	0.001828	2.3e-05	0.0787009	0.00538496	301274	56233	357507
2345	Ever had bowel cancer screening	0.993236	0.00666509	9.87149e-05	2.02448e-07	7.69225e-08	0.86553	0.127455	0.002812	0.004193	0.0236291	0.004077	240878	114475	355353
2365	Ever had prostate specific antigen (PSA) test	0.993529	0.00638657	7.87988e-05	5.40868e-06	3.32948e-08	0.829625	0.101631	0.06728	0.001455	0.0497646	0.00894076	108649	49459	158108
2375	Relative age of first facial hair	0.99526	0.00450969	0.000222164	8.07992e-06	3.58589e-07	0.577468	0.29203	0.103591	0.026907	0.132959	0.00962375	NA	NA	161470
2385	Relative age voice broke	0.994277	0.005605	0.000105853	1.1745e-05	1.52697e-07	0.725965	0.137891	0.12637	0.009766	0.0651151	0.00654618	NA	NA	154459
2395_1	Hair/balding pattern: Pattern 1	0.996632	0.00314276	0.000197925	2.74663e-05	9.06996e-08	0.403277	0.260543	0.333129	0.00305	0.387338	0.0364905	112573	53076	165649
2395_2	Hair/balding pattern: Pattern 2	0.994858	0.00510105	1.78674e-05	2.28016e-05	5.19705e-07	0.656883	0.022793	0.261084	0.059236	0.125737	0.0160877	127605	38044	165649
2395_3	Hair/balding pattern: Pattern 3	0.995103	0.00483544	3.90502e-05	2.17576e-05	3.73897e-07	0.640234	0.051673	0.280851	0.027237	0.0876632	0.0138405	121345	44304	165649
2395_4	Hair/balding pattern: Pattern 4	0.996622	0.00315392	0.000198075	2.61877e-05	1.02946e-07	0.407552	0.266781	0.321199	0.004467	0.42341	0.0429754	135424	30225	165649
24003_irnt	Nitrogen dioxide air pollution; 2010	0.993227	0.00669627	7.59156e-05	5.85529e-07	7.23301e-08	0.888183	0.099164	0.006371	0.006271	0.0137199	0.00281156	NA	NA	356078
24004_irnt	Nitrogen oxides air pollution; 2010	0.992994	0.00693995	6.50515e-05	8.16297e-07	9.95017e-09	0.906584	0.083067	0.009676	0.000661	0.0147754	0.00275713	NA	NA	356078
24006_irnt	Particulate matter air pollution (pm2.5); 2010	0.993134	0.00678395	8.12626e-05	4.00686e-07	1.64943e-07	0.877904	0.104538	0.004699	0.012848	0.013859	0.00259419	NA	NA	329886
24016_irnt	Nitrogen dioxide air pollution; 2005	0.993205	0.0066874	0.00010704	3.10751e-07	5.74048e-09	0.862813	0.135184	0.001962	3.1e-05	0.0154307	0.00311556	NA	NA	356078
24017_irnt	Nitrogen dioxide air pollution; 2006	0.993045	0.00687026	8.43265e-05	4.40486e-07	4.59239e-09	0.888868	0.107572	0.003485	6.4e-05	0.0155112	0.00306297	NA	NA	356078
24018_irnt	Nitrogen dioxide air pollution; 2007	0.993197	0.00670058	0.00010202	3.8002e-07	2.29619e-09	0.867358	0.129849	0.002739	4.4e-05	0.0160507	0.00298353	NA	NA	356078
24019_irnt	Particulate matter air pollution (pm10); 2007	0.992447	0.00751021	4.26786e-05	3.40602e-08	0	0.951521	0.04837	9.6e-05	0	0.0150142	0.00271074	NA	NA	355245
2405	Number of children fathered	0.993489	0.00640005	0.000110614	3.9418e-08	5.3884e-07	0.832126	0.143563	0.000514	0.023788	0.0328818	0.00558406	NA	NA	165492
2415	Had major operations	0.992911	0.00702509	6.34128e-05	3.74662e-07	3.90353e-08	0.910914	0.081305	0.005601	0.002169	0.0462122	0.00783115	59231	106506	165737
2443	Diabetes diagnosed by doctor	0.995091	0.00471749	0.000181193	9.29346e-06	7.94865e-07	0.59215	0.232494	0.097224	0.078128	0.205637	0.0156119	342917	17275	360192
2463	Fractured/broken bones in last 5 years	0.993627	0.00628989	7.68953e-05	6.49631e-06	1.1481e-08	0.819932	0.099558	0.080287	0.000214	0.0583163	0.00800439	324461	34780	359241
2473	Other serious medical condition/disability diagnosed by doctor	0.993609	0.00625868	0.000131374	1.2962e-06	1.19785e-07	0.809633	0.168164	0.015864	0.00633	0.0599019	0.00538582	281623	72965	354588
2492	Taking other prescription medications	0.994266	0.00553011	0.000202111	2.10063e-06	4.24796e-08	0.715944	0.257358	0.025489	0.001202	0.0746976	0.0044324	191034	168993	360027
2644	Light smokers, at least 100 smokes in lifetime	0.993691	0.00618025	0.000126367	2.6544e-06	5.35778e-09	0.802706	0.16397	0.033246	7e-05	0.138143	0.0168093	52768	44253	97021
2654_4	Non-butter spread type details: Soft (tub) margarine	0.992808	0.00714731	4.3232e-05	1.02793e-06	3.86526e-08	0.929019	0.056085	0.011734	0.003149	0.0637785	0.0109211	166469	23625	190094
2654_6	Non-butter spread type details: Olive oil based spread (eg: Bertolli)	0.993189	0.00673156	7.78708e-05	1.03558e-06	1.11748e-07	0.874273	0.100634	0.012635	0.012447	0.0376726	0.00881523	143064	47030	190094
2664_3	Reason for reducing amount of alcohol drunk: Health precaution	0.993248	0.00668272	6.72712e-05	1.36279e-06	4.01451e-07	0.868679	0.086503	0.018768	0.026039	0.0795183	0.0112591	90165	43868	134033
2664_5	Reason for reducing amount of alcohol drunk: Other reason	0.993181	0.00674421	7.27132e-05	1.57442e-06	1.85992e-07	0.87209	0.093724	0.017923	0.016252	0.0636839	0.00967716	63424	70609	134033
2714	Age when periods started (menarche)	0.995257	0.00446569	0.000272076	4.82239e-06	4.17142e-08	0.583646	0.350804	0.063406	0.002139	0.208984	0.0120533	NA	NA	188644
2724	Had menopause	0.994831	0.00509284	5.95828e-05	1.64844e-05	5.64098e-07	0.649442	0.076507	0.208647	0.065399	0.0661001	0.0113127	43829	119355	163184
2734	Number of live births	0.993712	0.00614758	0.000137527	2.51471e-06	1.18637e-08	0.798009	0.179776	0.022056	0.000151	0.0556295	0.00508351	NA	NA	193953
2744	Birth weight of first child	0.994992	0.00475442	0.000247904	5.50589e-06	5.51086e-08	0.612962	0.321945	0.063639	0.00145	0.111522	0.00748021	NA	NA	155202
2754_irnt	Age at first live birth	0.993764	0.00606122	0.000174517	1.89436e-07	0	0.786208	0.212923	0.000861	0	0.184933	0.00884535	NA	NA	131987
2764_irnt	Age at last live birth	0.993754	0.00608319	0.000162756	2.94678e-07	6.50588e-09	0.788907	0.208227	0.002619	0.000239	0.104594	0.00747416	NA	NA	131806
2774	Ever had stillbirth, spontaneous miscarriage or termination	0.993124	0.00678134	9.46621e-05	1.51166e-07	1.5308e-09	0.876816	0.121683	0.001473	1.6e-05	0.0368898	0.0074691	130687	60565	191252
2784	Ever taken oral contraceptive pill	0.992749	0.0071496	9.75453e-05	3.55757e-06	0	0.846287	0.113651	0.040051	0	0.0509962	0.00933955	33989	159724	193713
2794_irnt	Age started oral contraceptive pill	0.993496	0.00638385	0.000119115	1.46191e-06	6.88858e-09	0.829838	0.155671	0.014378	0.000105	0.0624719	0.00607089	NA	NA	154112
2814	Ever used hormone-replacement therapy (HRT)	0.99385	0.00600821	0.000138197	3.49327e-06	1.1481e-09	0.778138	0.179165	0.042656	3.2e-05	0.0752331	0.00805981	117427	76177	193604
2844	Had other major operations	0.993225	0.00670224	6.92379e-05	3.90123e-06	7.27128e-09	0.867908	0.089015	0.042948	0.000119	0.0561891	0.00805958	63035	129433	192468
2867_irnt	Age started smoking in former smokers	0.993267	0.00664167	8.96373e-05	2.15498e-06	4.20969e-09	0.862934	0.115366	0.02161	7.9e-05	0.0711658	0.00979847	NA	NA	88898
2887	Number of cigarettes previously smoked daily	0.99373	0.00620173	6.60492e-05	9.69759e-07	9.78944e-07	0.805403	0.08636	0.013634	0.094593	0.10863	0.0246652	NA	NA	84456
2926	Number of unsuccessful stop-smoking attempts	0.993242	0.0066729	8.35091e-05	1.90507e-06	4.89855e-08	0.867343	0.106675	0.023103	0.00287	0.0494598	0.0114166	NA	NA	81026
2966_irnt	Age high blood pressure diagnosed	0.993794	0.00614285	5.30692e-05	1.03734e-05	8.03668e-09	0.794441	0.068247	0.136863	0.00044	0.0776291	0.00953937	NA	NA	87024
30000_irnt	White blood cell (leukocyte) count	0.995259	0.00453218	0.000196341	1.23332e-05	3.71218e-07	0.57633	0.249813	0.142695	0.031158	0.190975	0.00851421	NA	NA	350470
30010_irnt	Red blood cell (erythrocyte) count	0.995818	0.00397132	0.000194488	1.57787e-05	1.92498e-07	0.529724	0.267197	0.183915	0.019161	0.233745	0.0232732	NA	NA	350475
30020_irnt	Haemoglobin concentration	0.995894	0.00386282	0.000234291	8.47716e-06	8.93602e-07	0.508221	0.318616	0.092284	0.080876	0.173933	0.0112083	NA	NA	350474
30030_irnt	Haematocrit percentage	0.995781	0.00396815	0.000240583	9.7504e-06	4.5809e-07	0.521452	0.316568	0.130403	0.031575	0.163077	0.0113122	NA	NA	350475
30060_irnt	Mean corpuscular haemoglobin concentration	0.996395	0.00345513	0.000128947	1.90171e-05	1.80519e-06	0.445097	0.170615	0.217075	0.167211	0.0531758	0.0050146	NA	NA	350468
30070_irnt	Red blood cell (erythrocyte) distribution width	0.997138	0.00264953	0.000184061	2.7239e-05	9.37612e-07	0.347383	0.252192	0.309587	0.090837	0.217173	0.0178335	NA	NA	350473
30080_irnt	Platelet count	0.996623	0.00316291	0.000191144	2.27794e-05	6.636e-07	0.408443	0.252688	0.275745	0.063123	0.307884	0.0327639	NA	NA	350474
30120_irnt	Lymphocyte count	0.99553	0.00425834	0.000196366	1.45713e-05	4.16376e-07	0.542618	0.257935	0.166752	0.032692	0.210252	0.016044	NA	NA	349856
30130_irnt	Monocyte count	0.996649	0.00315996	0.000168265	2.20102e-05	1.19019e-06	0.407296	0.222256	0.273887	0.096561	0.230464	0.0325419	NA	NA	349856
30140_irnt	Neutrophill count	0.995618	0.00416929	0.000197598	1.50925e-05	1.98621e-07	0.542688	0.259731	0.186891	0.010686	0.164108	0.00826643	NA	NA	349856
30150	Eosinophill count	0.996417	0.00333451	0.000225982	2.17354e-05	3.17257e-07	0.435133	0.30579	0.235319	0.023756	0.18403	0.0132688	NA	NA	349856
30160	Basophill count	0.994148	0.00572438	0.000119189	8.85718e-06	6.12318e-09	0.736297	0.153389	0.110225	8.2e-05	0.0242111	0.00378762	NA	NA	349856
30180_irnt	Lymphocyte percentage	0.995924	0.0038143	0.000246628	1.47615e-05	1.93263e-07	0.493601	0.329438	0.158935	0.018024	0.163168	0.0126605	NA	NA	349861
30200_irnt	Neutrophill percentage	0.996001	0.0037283	0.000257715	1.31859e-05	1.65326e-07	0.488596	0.346851	0.158254	0.006296	0.152658	0.0102402	NA	NA	349861
30210_irnt	Eosinophill percentage	0.996865	0.00284696	0.000267347	2.09375e-05	1.25143e-07	0.373104	0.365193	0.258646	0.003057	0.215265	0.0158417	NA	NA	349861
30220_irnt	Basophill percentage	0.996231	0.00364495	9.47283e-05	2.87556e-05	7.66928e-07	0.462813	0.124698	0.338364	0.074123	0.0486499	0.00779673	NA	NA	349861
30250_irnt	Reticulocyte count	0.99576	0.00408869	0.000130372	2.02088e-05	4.29771e-07	0.523598	0.17165	0.253471	0.051278	0.227442	0.0276397	NA	NA	344729
30280_irnt	Immature reticulocyte fraction	0.996306	0.00350541	0.00017111	1.55766e-05	1.64905e-06	0.430339	0.215481	0.175298	0.17888	0.164055	0.0214272	NA	NA	344728
30500_irnt	Microalbumin in urine	0.993609	0.00633999	4.75549e-05	2.41139e-06	7.59657e-07	0.826103	0.061293	0.034144	0.078451	0.0425538	0.00861339	NA	NA	108706
30510_irnt	Creatinine (enzymatic) in urine	0.994246	0.00553586	0.000217012	7.08758e-07	3.82699e-10	0.717829	0.273679	0.008484	2e-06	0.0660358	0.00357031	NA	NA	350812
30520_irnt	Potassium in urine	0.994137	0.00565841	0.000203478	7.42053e-07	6.88858e-09	0.733572	0.260157	0.006195	6.9e-05	0.0420621	0.00291226	NA	NA	350053
30530_irnt	Sodium in urine	0.994123	0.00567113	0.000205334	6.98425e-07	5.35778e-08	0.735797	0.25639	0.006543	0.001263	0.072566	0.00373485	NA	NA	350061
30600_irnt	Albumin (g/L)	0.995672	0.0040908	0.000227575	8.41899e-06	1.23956e-06	0.518161	0.2917	0.098915	0.091222	0.144611	0.00940991	NA	NA	315268
30620_irnt	Alanine aminotransferase (U/L)	0.995801	0.0039744	0.000212786	1.14928e-05	5.08607e-07	0.516325	0.279004	0.140352	0.064316	0.132455	0.0126165	NA	NA	344136
3062_irnt	Forced vital capacity (FVC)	0.994021	0.00581143	0.000166265	1.7497e-06	8.80207e-09	0.766704	0.215401	0.017746	0.000142	0.209992	0.00815323	NA	NA	329404
3063_irnt	Forced expiratory volume in 1-second (FEV1)	0.99398	0.00585169	0.00016634	1.62073e-06	2.37273e-08	0.772007	0.212899	0.014727	0.00036	0.191973	0.00759459	NA	NA	329404
30640_irnt	Apoliprotein B (g/L)	0.997592	0.00228384	0.000102542	2.06125e-05	1.28472e-06	0.330358	0.151457	0.270561	0.247623	0.0915113	0.0216886	NA	NA	342590
3064_irnt	Peak expiratory flow (PEF)	0.99447	0.00529806	0.000231095	2.63679e-07	1.96707e-07	0.69471	0.29696	0.003016	0.005308	0.106068	0.00567591	NA	NA	329404
30650_irnt	Aspartate aminotransferase (U/L)	0.996257	0.00351938	0.000208529	1.39892e-05	1.52123e-06	0.432811	0.264309	0.140741	0.162138	0.142546	0.0144226	NA	NA	342990
30670_irnt	Urea (mmol/L)	0.995338	0.00448754	0.000157675	1.64939e-05	1.30118e-07	0.585576	0.207241	0.199979	0.0072	0.119294	0.00810111	NA	NA	344052
30680_irnt	Calcium (mmol/L)	0.996137	0.00367273	0.000168627	2.17978e-05	2.52199e-07	0.469402	0.220286	0.28264	0.027671	0.13492	0.0131499	NA	NA	315153
30690_irnt	Cholesterol (mmol/L)	0.997005	0.00284234	0.00013103	2.03554e-05	1.29008e-06	0.370909	0.177524	0.254537	0.197029	0.112142	0.0164321	NA	NA	344278
30700_irnt	Creatinine (umol/L)	0.995452	0.0043109	0.000226101	1.10187e-05	3.9418e-08	0.5677	0.301509	0.129726	0.001062	0.211492	0.0125864	NA	NA	344104
30740_irnt	Glucose (mmol/L)	0.996077	0.00377118	0.000136521	1.46e-05	8.70257e-07	0.468742	0.170281	0.18541	0.175564	0.0891545	0.0147792	NA	NA	314916
30750_irnt	Glycated haemoglobin (mmol/mol)	0.996292	0.00352096	0.000169991	1.66528e-05	7.33251e-07	0.457405	0.226542	0.201587	0.114463	0.195971	0.0128521	NA	NA	344182
30760_irnt	HDL cholesterol (mmol/L)	0.995931	0.00396182	8.8462e-05	1.8784e-05	3.75045e-07	0.539748	0.120975	0.256922	0.082352	0.329514	0.0709335	NA	NA	315133
30770_irnt	IGF-1 (nmol/L)	0.99565	0.0041358	0.000200321	1.42004e-05	1.45808e-07	0.545436	0.264686	0.175335	0.01454	0.253212	0.0184681	NA	NA	342439
30780_irnt	LDL direct (mmol/L)	0.997298	0.00256589	0.000117525	1.73891e-05	1.50936e-06	0.345103	0.162524	0.227628	0.264745	0.0824669	0.016846	NA	NA	343621
30810_irnt	Phosphate (mmol/L)	0.996073	0.00370122	0.000213027	1.18445e-05	7.57744e-07	0.480156	0.279531	0.146228	0.094083	0.13365	0.0170112	NA	NA	314658
30850_irnt	Testosterone (nmol/L)	0.995968	0.00382375	0.000197486	9.52997e-06	1.24377e-06	0.494281	0.262186	0.111679	0.131852	0.0770816	0.00753482	NA	NA	312102
30860_irnt	Total protein (g/L)	0.995654	0.00411248	0.000221581	1.12762e-05	7.19474e-07	0.52045	0.283036	0.139751	0.056761	0.166598	0.0128846	NA	NA	314921
30890_irnt	Vitamin D (nmol/L)	0.995635	0.00425766	0.000102561	4.03441e-06	9.87746e-07	0.556937	0.137059	0.052273	0.253728	0.100278	0.0191277	NA	NA	329247
3143_irnt	Ankle spacing width	0.99478	0.00499707	0.000215879	6.60576e-06	2.33446e-08	0.652413	0.277505	0.069484	0.000593	0.301831	0.0155354	NA	NA	206589
3144_irnt	Heel Broadband ultrasound attenuation, direct entry	0.99618	0.00357648	0.000227921	1.5466e-05	2.46075e-07	0.478976	0.313988	0.187018	0.020015	0.288307	0.0282921	NA	NA	206576
3147_irnt	Heel quantitative ultrasound index (QUI), direct entry	0.996206	0.00355383	0.000224812	1.45716e-05	3.6012e-07	0.477099	0.308757	0.183678	0.030464	0.315203	0.0310787	NA	NA	206589
3148_irnt	Heel bone mineral density (BMD)	0.996175	0.00358987	0.000218543	1.62655e-05	3.06159e-08	0.484127	0.302822	0.211821	0.001228	0.317506	0.0311446	NA	NA	206496
3393	Hearing aid user	0.993568	0.00636663	5.77672e-05	7.92148e-06	1.45426e-08	0.824131	0.073926	0.101077	0.000857	0.0984565	0.0159416	208416	10942	219358
3526_irnt	Mother age at death	0.993073	0.00685284	7.33986e-05	6.96512e-07	2.83197e-08	0.893934	0.094593	0.008257	0.003206	0.0221543	0.0039566	NA	NA	213636
3536_irnt	Age started hormone-replacement therapy (HRT)	0.99382	0.00610886	6.09467e-05	9.81087e-06	9.29958e-08	0.793004	0.078464	0.123113	0.005411	0.077655	0.0174337	NA	NA	68299
3571	Back pain for 3+ months	0.992771	0.00712664	9.9951e-05	2.73094e-06	1.57289e-07	0.842098	0.116241	0.031196	0.010454	0.0643085	0.0133549	28500	62055	90555
3581_irnt	Age at menopause (last menstrual period)	0.995543	0.00433809	9.72908e-05	2.15345e-05	4.95212e-07	0.55201	0.127037	0.2625	0.05845	0.114844	0.0127957	NA	NA	111593
3591	Ever had hysterectomy (womb removed)	0.993391	0.00655065	5.03999e-05	7.45803e-06	6.16145e-08	0.844901	0.06437	0.088839	0.00188	0.0870211	0.0180474	157440	13973	171413
3761_irnt	Age hay fever, rhinitis or eczema diagnosed	0.994403	0.00553215	4.67899e-05	1.76072e-05	2.92382e-07	0.71215	0.060666	0.194311	0.032866	0.110415	0.0177825	NA	NA	72232
3799	Headaches for 3+ months	0.993376	0.00651479	0.000108137	7.30572e-07	1.27056e-07	0.844409	0.138829	0.009165	0.007588	0.0769497	0.0169089	38106	32075	70181
3849	Number of pregnancy terminations	0.993185	0.00672935	8.51126e-05	9.19625e-07	6.58242e-08	0.87523	0.108283	0.011545	0.004932	0.0705962	0.0129357	NA	NA	60099
398	Number of correct matches in round	0.993424	0.00646249	0.000111787	2.10102e-06	1.1481e-09	0.833953	0.14316	0.022844	3.4e-05	0.0147919	0.00219195	NA	NA	360686
399_irnt	Number of incorrect matches in round	0.994162	0.00562276	0.000215156	2.49137e-07	3.06159e-09	0.726595	0.272003	0.001377	2e-05	0.0542191	0.00307008	NA	NA	360686
400_irnt	Time to complete round	0.994066	0.0057242	0.00020989	2.85111e-07	8.80207e-09	0.743258	0.255697	0.001007	3.1e-05	0.0916554	0.00407496	NA	NA	354739
404_irnt	Duration to first press of snap-button in each round	0.993914	0.00589491	0.000191008	1.08686e-07	3.82699e-10	0.764235	0.235405	0.000351	1e-06	0.0813041	0.00329432	NA	NA	358500
4079_irnt	Diastolic blood pressure, automated reading	0.994597	0.00516068	0.000240148	1.93837e-06	2.52581e-08	0.674478	0.304963	0.020144	0.000409	0.143291	0.00578632	NA	NA	340162
4080_irnt	Systolic blood pressure, automated reading	0.994367	0.00542795	0.000201331	3.5193e-06	1.22464e-08	0.70644	0.257547	0.035868	0.000138	0.151248	0.00634136	NA	NA	340159
4100_irnt	Ankle spacing width (left)	0.994942	0.00481895	0.000232277	7.02061e-06	8.41937e-09	0.626205	0.300787	0.072838	0.000166	0.317641	0.0176579	NA	NA	114630
4101_irnt	Heel broadband ultrasound attenuation (left)	0.996046	0.00372503	0.00021287	1.5642e-05	1.62264e-07	0.494352	0.289642	0.202842	0.013162	0.298408	0.0317278	NA	NA	114625
4104_irnt	Heel quantitative ultrasound index (QUI), direct entry (left)	0.996173	0.00359956	0.00021053	1.6807e-05	8.03668e-08	0.48026	0.288154	0.226679	0.004905	0.332008	0.0333387	NA	NA	114630
4105_irnt	Heel bone mineral density (BMD) (left)	0.996259	0.00350943	0.000213616	1.77653e-05	2.57174e-07	0.467884	0.28881	0.225972	0.017332	0.334856	0.0334721	NA	NA	114561
4106_irnt	Heel bone mineral density (BMD) T-score, automated (left)	0.996139	0.00364252	0.000200777	1.74744e-05	3.40219e-07	0.486532	0.275741	0.21116	0.026565	0.332009	0.033339	NA	NA	114630
4119_irnt	Ankle spacing width (right)	0.995017	0.00472776	0.000249458	5.51507e-06	2.64062e-08	0.614547	0.323587	0.061402	0.00046	0.312397	0.0169954	NA	NA	114614
4120_irnt	Heel broadband ultrasound attenuation (right)	0.996269	0.00349274	0.000220713	1.7161e-05	2.83197e-07	0.464725	0.301039	0.20865	0.025583	0.294529	0.0318837	NA	NA	114609
41215_0	Detention categories: Informal, not formally detained	0.993097	0.00682444	7.70637e-05	1.21469e-06	2.71716e-08	0.884431	0.099212	0.013778	0.002568	0.0352824	0.00785933	332966	28228	361194
41231_1	Hospital episode type: General episode	0.993334	0.00653687	0.000129452	7.34782e-08	0	0.83995	0.159719	0.00032	0	0.0350321	0.00445035	114387	246807	361194
41235	Spells in hospital	0.993272	0.00662448	0.000102965	4.47758e-07	1.68387e-08	0.861041	0.133679	0.00389	0.001379	0.0370246	0.00386177	NA	NA	236484
4123_irnt	Heel quantitative ultrasound index (QUI), direct entry (right)	0.996285	0.00348018	0.000217702	1.67297e-05	3.82316e-07	0.46248	0.293721	0.21189	0.031907	0.331454	0.0342075	NA	NA	114614
41248_1000	Destinations on discharge from hospital (recoded): Usual Place of residence	0.993404	0.00647183	0.000123016	6.91154e-07	2.67889e-09	0.836966	0.15701	0.005996	1.8e-05	0.0462209	0.00438676	128424	232634	361058
4124_irnt	Heel bone mineral density (BMD) (right)	0.996097	0.00368508	0.00020165	1.6254e-05	3.90353e-07	0.490309	0.277556	0.198196	0.033938	0.332595	0.0344203	NA	NA	114552
4125_irnt	Heel bone mineral density (BMD) T-score, automated (right)	0.996231	0.00353879	0.000212502	1.75892e-05	1.13279e-07	0.472099	0.288617	0.228242	0.01104	0.331446	0.034206	NA	NA	114614
4194_irnt	Pulse rate	0.995123	0.00469134	0.000172543	1.283e-05	2.56408e-08	0.608593	0.228407	0.162004	0.000992	0.143208	0.0138409	NA	NA	118850
4195_irnt	Pulse wave reflection index	0.993508	0.00642032	6.54962e-05	6.251e-06	1.17106e-07	0.83497	0.08459	0.075997	0.004434	0.0563044	0.00729465	NA	NA	118850
4196_irnt	Pulse wave peak to peak time	0.993335	0.0065915	6.83037e-05	4.95786e-06	5.74048e-09	0.853824	0.087947	0.057815	0.000403	0.0499978	0.00753335	NA	NA	118787
4270	Volume level set by participant (left)	0.992932	0.00701346	5.34688e-05	1.35054e-06	7.34782e-08	0.911535	0.068586	0.015857	0.00401	0.0346763	0.00744697	NA	NA	116790
4288_irnt	Time to answer	0.99359	0.00627223	0.000137025	8.3658e-07	2.44927e-08	0.813207	0.178518	0.007809	0.000456	0.0323857	0.00732227	NA	NA	119729
4290_irnt	Duration screen displayed	0.993709	0.00614562	0.000144048	1.66665e-06	1.33945e-08	0.798624	0.185275	0.015847	0.000246	0.101286	0.00839515	NA	NA	119729
4291	Number of attempts	0.993462	0.006454	7.87032e-05	5.6073e-06	2.83197e-08	0.837197	0.102002	0.060344	0.000448	0.105632	0.0164895	23991	95738	119729
4526	Happiness	0.99332	0.00657369	0.000105798	8.35049e-07	2.0283e-08	0.854923	0.13593	0.008355	0.000782	0.060587	0.00662265	NA	NA	119535
4537	Work/job satisfaction	0.99313	0.00678012	8.90406e-05	6.88858e-07	9.95017e-09	0.87834	0.113614	0.007604	0.00043	0.0505546	0.0101009	NA	NA	82190
4548	Health satisfaction	0.993922	0.00589758	0.000180051	2.84728e-07	0	0.765213	0.23278	0.002	0	0.0941017	0.00793097	NA	NA	119567
4559	Family relationship satisfaction	0.993264	0.00663277	0.000102799	3.8002e-07	3.82699e-09	0.862431	0.133054	0.004314	0.000191	0.0639023	0.00707642	NA	NA	118818
4570	Friendships satisfaction	0.993324	0.00658252	9.0152e-05	2.98046e-06	3.82699e-09	0.850304	0.116572	0.033061	5.3e-05	0.0614575	0.0072074	NA	NA	118649
4581	Financial situation satisfaction	0.993244	0.00665561	9.96643e-05	1.01874e-06	3.02332e-08	0.860184	0.128576	0.010174	0.001056	0.0609605	0.00709503	NA	NA	119394
4598	Ever depressed for a whole week	0.993374	0.00655455	7.03443e-05	1.54916e-06	2.25792e-08	0.88244	0.094404	0.0204	0.002746	0.0988932	0.0116794	54586	63119	117705
4631	Ever unenthusiastic/disinterested for a whole week	0.993552	0.00631488	0.000132396	1.00726e-06	1.49253e-08	0.817922	0.169893	0.011705	0.000471	0.0751685	0.0133178	72771	42374	115145
4653	Ever highly irritable/argumentative for 2 days	0.993047	0.00687632	7.50568e-05	1.22157e-06	3.75045e-08	0.888803	0.096074	0.013956	0.001155	0.0975616	0.0164794	96429	20930	117359
4674	Private healthcare	0.993542	0.00635953	9.44152e-05	3.86105e-06	5.43432e-08	0.82542	0.121454	0.048901	0.004216	0.0297662	0.0065492	NA	NA	119300
46_irnt	Hand grip strength (left)	0.993595	0.0062567	0.000147864	3.40985e-07	5.74048e-09	0.815945	0.181297	0.002665	8.3e-05	0.116554	0.00438505	NA	NA	359704
4717	Shortness of breath walking on level ground	0.993341	0.00655527	0.000102341	1.57404e-06	6.50588e-09	0.850798	0.132271	0.016802	0.000119	0.13743	0.0202199	105588	12418	118006
4728	Leg pain on walking	0.993233	0.00666785	9.84152e-05	1.15958e-06	1.49253e-08	0.861722	0.126842	0.011167	0.00026	0.124237	0.0135832	92908	25997	118905
47_irnt	Hand grip strength (right)	0.993898	0.00591689	0.000184242	4.82583e-07	7.65398e-09	0.770596	0.226046	0.003309	4.1e-05	0.11688	0.00440655	NA	NA	359729
4803_0	Tinnitus: No, never	0.993552	0.006317	0.000130672	6.57094e-07	2.37273e-08	0.822417	0.169665	0.007251	0.000658	0.121453	0.0111595	34267	83615	117882
48_irnt	Waist circumference	0.99327	0.00663975	8.92404e-05	1.16034e-06	1.37772e-08	0.869178	0.112228	0.017736	0.000849	0.205681	0.00732421	NA	NA	360564
4957	FI3 : word interpolation	0.993989	0.00582961	0.000180272	1.25563e-06	6.12318e-09	0.75521	0.233299	0.011403	8.1e-05	0.19059	0.0202364	18062	98753	116815
4968	FI4 : positional arithmetic	0.993617	0.00625389	0.000127185	2.0903e-06	4.59239e-09	0.81245	0.165819	0.021681	4.1e-05	0.163133	0.016938	17346	98344	115690
4979	FI5 : family relationship calculation	0.993102	0.00681547	8.19504e-05	9.11206e-07	3.40602e-08	0.882302	0.10491	0.010571	0.002206	0.066234	0.0109567	57434	55922	113356
4990	FI6 : conditional arithmetic	0.993889	0.00593446	0.000176252	1.33562e-07	3.06159e-09	0.770646	0.22808	0.001225	4.1e-05	0.167006	0.0149901	32237	69944	102181
49_irnt	Hip circumference	0.993655	0.00621542	0.000128094	1.32376e-06	7.65398e-09	0.816857	0.163255	0.019385	0.000496	0.223217	0.00779968	NA	NA	360521
5012	FI8 : chained arithmetic	0.993487	0.00641624	9.2173e-05	4.45155e-06	0	0.834187	0.120321	0.045482	0	0.193206	0.0199755	26606	49086	75692
5084_irnt	Spherical power (right)	0.995165	0.00462362	0.00019977	1.16765e-05	1.79868e-08	0.600655	0.26239	0.136525	0.000426	0.326352	0.0200949	NA	NA	77983
5085_irnt	Spherical power (left)	0.995087	0.00470769	0.000194377	1.0869e-05	1.01032e-07	0.611294	0.259142	0.127048	0.002512	0.328175	0.0204857	NA	NA	77739
5096_irnt	3mm weak meridian (left)	0.995978	0.00373554	0.000274361	1.22356e-05	2.05127e-07	0.485458	0.361089	0.122242	0.031208	0.393818	0.0387616	NA	NA	75398
5097_irnt	6mm weak meridian (left)	0.995813	0.00391049	0.000264329	1.17466e-05	2.76309e-07	0.507528	0.348332	0.115602	0.028536	0.433908	0.0383355	NA	NA	65551
5098_irnt	6mm weak meridian (right)	0.995775	0.00394619	0.000267464	1.10814e-05	1.96324e-07	0.512122	0.350578	0.113117	0.02418	0.418781	0.0370189	NA	NA	66256
5099_irnt	3mm weak meridian (right)	0.995876	0.00385299	0.000258331	1.25705e-05	3.0348e-07	0.499906	0.338866	0.12766	0.033566	0.387322	0.0403525	NA	NA	75410
50_irnt	Standing height	0.994962	0.00482505	0.000201545	1.10585e-05	2.71716e-08	0.619256	0.274752	0.10565	0.000338	0.485223	0.0218115	NA	NA	360388
5100_irnt	3mm weak meridian angle (right)	0.99338	0.00650918	0.000109577	7.34399e-07	5.81702e-08	0.845865	0.141326	0.008711	0.004088	0.0450528	0.0111871	NA	NA	75410
5101_irnt	6mm weak meridian angle (right)	0.993479	0.00640795	0.000111466	1.33906e-06	2.44927e-08	0.83698	0.1443	0.016083	0.002627	0.0719691	0.0122935	NA	NA	66256
5103_irnt	3mm weak meridian angle (left)	0.99288	0.0070019	0.000116451	1.0375e-06	2.39569e-07	0.829055	0.13597	0.012758	0.022206	0.0533036	0.0104596	NA	NA	75398
5104_irnt	3mm strong meridian angle (left)	0.993531	0.00639435	6.73052e-05	6.8086e-06	7.34782e-08	0.828911	0.086296	0.081114	0.00367	0.0873528	0.0112939	NA	NA	75398
5106_irnt	6mm strong meridian angle (right)	0.993489	0.00642985	7.43599e-05	6.47373e-06	0	0.829765	0.095019	0.075206	0	0.0738279	0.0134011	NA	NA	66256
5107_irnt	3mm strong meridian angle (right)	0.993552	0.0063691	7.29967e-05	5.7068e-06	1.61499e-07	0.825676	0.093774	0.076361	0.004179	0.0753887	0.0108557	NA	NA	75410
5108_irnt	3mm asymmetry angle (right)	0.993387	0.00652357	8.70433e-05	2.60197e-06	6.92685e-08	0.849987	0.112621	0.03186	0.005522	0.0558056	0.0111637	NA	NA	74038
5109_irnt	6mm asymmetry angle (right)	0.993011	0.00692324	6.44622e-05	1.33677e-06	4.3245e-08	0.897248	0.082878	0.016363	0.0035	0.0886722	0.0193929	NA	NA	41390
5110_irnt	6mm asymmetry angle (left)	0.993372	0.00652593	9.98178e-05	2.41406e-06	1.5308e-08	0.841079	0.126742	0.031566	0.000604	0.103201	0.0200806	NA	NA	40683
5111_irnt	3mm asymmetry angle (left)	0.993333	0.00658717	7.56213e-05	3.98887e-06	1.1481e-08	0.853859	0.097628	0.047976	0.000527	0.0704483	0.0121463	NA	NA	73818
5112_irnt	3mm cylindrical power angle (left)	0.993117	0.0068065	7.50545e-05	1.39685e-06	6.85031e-08	0.881412	0.095416	0.016887	0.006275	0.0535131	0.0104562	NA	NA	75389
5114_irnt	6mm cylindrical power angle (right)	0.993187	0.00674902	6.00634e-05	3.46916e-06	7.65398e-10	0.879687	0.077739	0.042513	5e-05	0.0719262	0.0122429	NA	NA	66237
5116_irnt	3mm cylindrical power (right)	0.994079	0.00579811	0.000113713	8.97926e-06	1.07156e-08	0.750233	0.145509	0.103893	0.000357	0.111564	0.0133676	NA	NA	75410
5119_irnt	3mm cylindrical power (left)	0.993823	0.00606046	0.000109768	6.3107e-06	3.36775e-08	0.784547	0.141669	0.072216	0.001559	0.0877024	0.0115062	NA	NA	75398
5132_irnt	3mm strong meridian (right)	0.995806	0.00393101	0.000250721	1.23807e-05	1.43895e-07	0.510682	0.334596	0.125801	0.028918	0.383519	0.0390184	NA	NA	75410
5133_irnt	6mm strong meridian (right)	0.995658	0.00408202	0.000248874	1.13336e-05	1.6456e-07	0.527747	0.328904	0.119133	0.024213	0.423025	0.0369945	NA	NA	66256
5134_irnt	6mm strong meridian (left)	0.995676	0.00407024	0.000240529	1.29555e-05	2.02448e-07	0.526878	0.316423	0.130793	0.025903	0.427685	0.0380381	NA	NA	65551
5135_irnt	3mm strong meridian (left)	0.99592	0.00380037	0.000267727	1.19245e-05	1.7872e-07	0.492741	0.353744	0.122384	0.031129	0.385232	0.0374009	NA	NA	75398
5157_irnt	6mm asymmetry index (left)	0.993742	0.00615363	9.91607e-05	5.56635e-06	8.95515e-08	0.7999	0.12822	0.069253	0.002619	0.128367	0.0216023	NA	NA	40683
5158_irnt	6mm asymmetry index (right)	0.993952	0.00592246	0.000120228	5.50321e-06	1.3892e-07	0.768172	0.155526	0.067359	0.008936	0.128275	0.0221449	NA	NA	41390
5159_irnt	3mm asymmetry index (right)	0.993223	0.00668931	8.5736e-05	1.99156e-06	4.82201e-08	0.86356	0.108963	0.023474	0.003993	0.0494661	0.0114308	NA	NA	74038
5201_irnt	logMAR, final (right)	0.993527	0.00636698	0.000105337	1.68387e-08	4.64596e-07	0.82725	0.135165	0.000132	0.037443	0.0481139	0.0104839	NA	NA	79293
5254_irnt	Intra-ocular pressure, corneal-compensated (right)	0.994879	0.00491014	0.000204921	6.13084e-06	2.00917e-07	0.634226	0.270698	0.086588	0.008483	0.165973	0.0156759	NA	NA	76630
5255_irnt	Intra-ocular pressure, Goldmann-correlated (right)	0.995224	0.00454473	0.000220044	1.11981e-05	9.95017e-09	0.592555	0.292381	0.114943	0.000117	0.235854	0.0184405	NA	NA	76630
5256_irnt	Corneal hysteresis (right)	0.995541	0.00428002	0.000161297	1.77316e-05	2.20052e-07	0.556056	0.215736	0.208101	0.020103	0.275428	0.0250166	NA	NA	76630
5257_irnt	Corneal resistance factor (right)	0.995714	0.00409863	0.000167168	2.01885e-05	1.8714e-07	0.533585	0.223364	0.233503	0.009544	0.335975	0.0288422	NA	NA	76630
5262_irnt	Intra-ocular pressure, corneal-compensated (left)	0.994585	0.00526053	0.000145248	9.34436e-06	1.27056e-07	0.683648	0.192302	0.117984	0.006059	0.169221	0.0146841	NA	NA	76510
5263_irnt	Intra-ocular pressure, Goldmann-correlated (left)	0.99522	0.00456692	0.000199213	1.3657e-05	2.411e-08	0.59647	0.264655	0.138415	0.000456	0.245903	0.0175837	NA	NA	76510
5264_irnt	Corneal hysteresis (left)	0.995486	0.00434297	0.000152083	1.86497e-05	7.15647e-08	0.560942	0.202025	0.232132	0.004897	0.246553	0.0223686	NA	NA	76510
5265_irnt	Corneal resistance factor (left)	0.995899	0.00389975	0.00017924	2.20966e-05	1.1634e-07	0.505481	0.239037	0.251027	0.004453	0.311305	0.0266668	NA	NA	76510
5983_irnt	ECG, heart rate	0.993724	0.00621464	5.23138e-05	9.24677e-06	1.02563e-07	0.803933	0.067021	0.123654	0.005385	0.0993714	0.0196866	NA	NA	53777
5984_irnt	ECG, load	0.993308	0.00660443	8.62523e-05	1.43665e-06	4.24796e-08	0.864245	0.112041	0.017668	0.006035	0.0658298	0.0150572	NA	NA	53843
5993	ECG, number of stages in a phase	0.992793	0.00708172	0.000122598	2.30806e-06	2.14311e-08	0.830674	0.142295	0.025718	0.001303	0.0637182	0.0141324	NA	NA	53998
6032_irnt	Maximum workload during fitness test	0.993458	0.00642342	0.000117784	8.23568e-07	5.5874e-08	0.836147	0.150979	0.010325	0.002539	0.0712956	0.014837	NA	NA	53998
6033_irnt	Maximum heart rate during fitness test	0.993596	0.00634015	5.62835e-05	7.49133e-06	1.91349e-08	0.823789	0.072537	0.102634	0.001031	0.0867526	0.0212251	NA	NA	53984
6138_1	Qualifications: College or University degree	0.992991	0.00692515	8.36308e-05	1.106e-07	0	0.902252	0.096892	0.000845	0	0.285602	0.00929696	241568	115981	357549
6138_100	Qualifications: None of the above	0.993545	0.00630146	0.000153956	5.9701e-08	0	0.816954	0.182863	0.000174	0	0.229308	0.00852919	296456	61093	357549
6138_2	Qualifications: A levels/AS levels or equivalent	0.993775	0.0060454	0.000179829	1.21698e-07	1.91349e-09	0.785522	0.214086	0.000376	7e-06	0.165538	0.00653172	259245	98304	357549
6138_3	Qualifications: O levels/GCSEs or equivalent	0.994075	0.00571847	0.00020638	1.08304e-07	2.29619e-09	0.738451	0.261068	0.000454	1.9e-05	0.0686474	0.00412917	188877	168672	357549
6138_4	Qualifications: CSEs or equivalent	0.993391	0.00650631	0.000100342	1.92306e-06	2.48754e-08	0.846809	0.130258	0.02208	0.000843	0.0420356	0.00677358	310877	46672	357549
6138_5	Qualifications: NVQ or HND or HNC or equivalent	0.993172	0.0067379	8.93055e-05	1.22693e-06	3.82699e-08	0.870636	0.114248	0.014052	0.001053	0.0351515	0.00493414	291005	66544	357549
6138_6	Qualifications: Other professional qualifications eg: nursing, teaching	0.994068	0.00573346	0.000197856	5.25445e-07	1.5308e-09	0.743272	0.253625	0.003088	8e-06	0.0778406	0.00581127	253308	104241	357549
6139_2	Gas or solid-fuel cooking/heating: A gas fire that you use regularly in winter time	0.993228	0.00668244	8.74624e-05	2.14579e-06	7.65398e-10	0.864849	0.112319	0.022814	8e-06	0.0157755	0.00369448	214751	145315	360066
6139_3	Gas or solid-fuel cooking/heating: An open solid fuel fire that you use regularly in winter time	0.993143	0.00676608	9.03843e-05	5.67925e-07	5.35778e-09	0.877299	0.116779	0.005794	0.000116	0.0508652	0.00696011	327404	32662	360066
6141_1	How are people in household related to participant: Husband, wife or partner	0.99346	0.00641492	0.000123321	1.26444e-06	9.56747e-09	0.830158	0.159525	0.010214	9.4e-05	0.042976	0.004977	93225	265738	358963
6142_1	Current employment status: In paid employment or self-employed	0.992872	0.0070664	6.04909e-05	1.02678e-06	3.06159e-08	0.911205	0.077267	0.010798	0.000719	0.0244762	0.00360733	154782	205149	359931
6142_2	Current employment status: Retired	0.993405	0.00642459	0.000166936	3.76614e-06	1.26291e-08	0.761033	0.195483	0.04238	0.001096	0.0180731	0.00380086	227000	132931	359931
6142_4	Current employment status: Unable to work because of sickness or disability	0.993423	0.00647193	0.000101655	3.08034e-06	2.10484e-08	0.839313	0.131901	0.028569	0.000208	0.135215	0.0126931	346175	13756	359931
6143_1	Transport type for commuting to job workplace: Car/motor vehicle	0.993345	0.00655688	9.68844e-05	1.62303e-06	7.53917e-08	0.851963	0.1252	0.019646	0.003181	0.0589468	0.00909882	38351	152481	190832
6143_3	Transport type for commuting to job workplace: Public transport	0.993189	0.00671896	9.12438e-05	3.57823e-07	1.30118e-08	0.875535	0.117856	0.00451	0.002087	0.0584123	0.00919572	151177	39655	190832
6143_4	Transport type for commuting to job workplace: Cycle	0.993412	0.00647983	0.000106304	2.24032e-06	2.18138e-08	0.839963	0.137107	0.022412	0.000508	0.0931803	0.0154089	175947	14885	190832
6144_4	Never eat eggs, dairy, wheat, sugar: Sugar or foods/drinks containing sugar	0.993957	0.00585317	0.000189908	7.15647e-08	0	0.757968	0.241675	0.00035	0	0.0967895	0.00726856	292485	67292	359777
6144_5	Never eat eggs, dairy, wheat, sugar: I eat all of the above	0.994134	0.00566027	0.000205274	4.37807e-07	6.50588e-09	0.735438	0.261066	0.003465	2.4e-05	0.0876482	0.00641614	81615	278162	359777
6145_1	Illness, injury, bereavement, stress in last 2 years: Serious illness, injury or assault to yourself	0.993066	0.00685953	7.29259e-05	1.22502e-06	8.03668e-09	0.892368	0.093829	0.012934	0.000857	0.0505546	0.00662531	325595	33241	358836
6145_100	Illness, injury, bereavement, stress in last 2 years: None of the above	0.993296	0.00659944	0.000104061	8.89009e-07	1.91349e-09	0.857297	0.133795	0.008823	7.4e-05	0.0434118	0.00344192	156985	201851	358836
6145_6	Illness, injury, bereavement, stress in last 2 years: Financial difficulties	0.993616	0.0062384	0.00014492	6.05812e-07	6.12318e-09	0.809315	0.186882	0.003743	5.1e-05	0.0906189	0.007269	318166	40670	358836
6146_100	Attendance/disability/mobility allowance: None of the above	0.993882	0.00593819	0.000179129	2.92765e-07	2.29619e-09	0.767122	0.230985	0.001878	7e-06	0.148027	0.0131276	20718	337879	358597
6146_2	Attendance/disability/mobility allowance: Disability living allowance	0.993404	0.00649057	0.000102617	2.93568e-06	0	0.840617	0.133497	0.025876	0	0.146648	0.0129502	342900	15697	358597
6146_3	Attendance/disability/mobility allowance: Blue badge	0.993327	0.00656059	0.000112064	6.21503e-07	7.65398e-10	0.850376	0.14431	0.005301	3e-06	0.135095	0.0159252	345864	12733	358597
6147_1	Reason for glasses/contact lenses: For short-sightedness, i.e. only or mainly for distance viewing such as driving, cinema etc (called 'myopia')	0.993798	0.00607098	0.000126207	4.84803e-06	3.86526e-08	0.78401	0.162636	0.052309	0.001037	0.0967216	0.00816495	331359	29318	360677
6147_2	Reason for glasses/contact lenses: For long-sightedness, i.e. for distance and near, but particularly for near tasks like reading (called 'hypermetropia')	0.993675	0.00622863	8.93958e-05	6.804e-06	0	0.805383	0.115025	0.079583	0	0.0666497	0.0116401	345586	15091	360677
6147_3	Reason for glasses/contact lenses: For just reading/near work as you are getting older (called presbyopia)	0.993302	0.00659697	9.88695e-05	1.8515e-06	3.82699e-09	0.853234	0.126634	0.020078	4.4e-05	0.0332526	0.00793163	329181	31496	360677
6149_1	Mouth/teeth dental problems: Mouth ulcers	0.994945	0.00494513	9.36399e-05	1.58587e-05	3.14578e-07	0.645758	0.122939	0.179963	0.051336	0.0991313	0.0115349	323010	36831	359841
6149_100	Mouth/teeth dental problems: None of the above	0.994106	0.00570836	0.000183666	2.06466e-06	3.44429e-09	0.739944	0.236006	0.024006	3.6e-05	0.0587897	0.00434573	141495	218346	359841
6149_3	Mouth/teeth dental problems: Bleeding gums	0.993734	0.00611074	0.000154831	7.57361e-07	5.35778e-09	0.791548	0.20139	0.007007	4.7e-05	0.0522306	0.00619612	313147	46694	359841
6149_4	Mouth/teeth dental problems: Loose teeth	0.993496	0.00639771	0.000103065	2.81092e-06	3.13813e-08	0.831424	0.132966	0.034346	0.001255	0.0707495	0.011391	345477	14364	359841
6149_6	Mouth/teeth dental problems: Dentures	0.993977	0.00584886	0.000172643	1.67392e-06	1.5308e-09	0.761099	0.218701	0.020189	4e-06	0.125729	0.00723243	298864	60977	359841
6150_100	Vascular/heart problems diagnosed by doctor: None of the above	0.994685	0.00508834	0.000223189	3.95137e-06	1.03329e-08	0.665166	0.293267	0.041424	0.000138	0.223485	0.00969596	106855	253565	360420
6150_2	Vascular/heart problems diagnosed by doctor: Angina	0.994002	0.00591409	7.22773e-05	1.16983e-05	8.41937e-08	0.767916	0.09378	0.133431	0.004866	0.161691	0.0182683	349048	11372	360420
6150_4	Vascular/heart problems diagnosed by doctor: High blood pressure	0.994821	0.00494565	0.000228307	5.36276e-06	4.97508e-09	0.64777	0.295722	0.056375	0.000129	0.238105	0.0105801	263281	97139	360420
6152_100	Blood clot, DVT, bronchitis, emphysema, asthma, rhinitis, eczema, allergy diagnosed by doctor: None of the above	0.995694	0.00408191	0.000208081	1.56007e-05	2.15459e-07	0.528859	0.276003	0.187138	0.007998	0.141436	0.0116919	116005	244522	360527
6152_8	Blood clot, DVT, bronchitis, emphysema, asthma, rhinitis, eczema, allergy diagnosed by doctor: Asthma	0.995413	0.00439082	0.000181797	1.40929e-05	2.14311e-08	0.572529	0.240931	0.186077	0.000459	0.167935	0.0137483	318894	41633	360527
6152_9	Blood clot, DVT, bronchitis, emphysema, asthma, rhinitis, eczema, allergy diagnosed by doctor: Hayfever, allergic rhinitis or eczema	0.99558	0.00418758	0.000220077	1.23734e-05	1.78338e-07	0.539018	0.291388	0.162216	0.007375	0.153853	0.0130845	277120	83407	360527
6153_1	Medication for cholesterol, blood pressure, diabetes, or take exogenous hormones: Cholesterol lowering medication	0.994703	0.005197	8.58462e-05	1.36872e-05	3.62798e-07	0.674044	0.112806	0.16893	0.044215	0.152853	0.0162071	168899	24247	193146
6153_100	Medication for cholesterol, blood pressure, diabetes, or take exogenous hormones: None of the above	0.994459	0.00534269	0.000193013	5.45882e-06	1.22464e-08	0.690977	0.254113	0.05457	0.000334	0.118756	0.00913826	59808	133338	193146
6153_2	Medication for cholesterol, blood pressure, diabetes, or take exogenous hormones: Blood pressure medication	0.995301	0.00442082	0.000272218	5.8817e-06	1.60734e-08	0.575991	0.359432	0.064284	0.000289	0.258441	0.0180486	159628	33518	193146
6154_1	Medication for pain relief, constipation, heartburn: Aspirin	0.993802	0.00608184	0.000110518	5.31339e-06	2.90851e-08	0.788041	0.144652	0.066442	0.000857	0.0614503	0.0062077	306880	50204	357084
6154_100	Medication for pain relief, constipation, heartburn: None of the above	0.994082	0.00571129	0.000206634	2.10867e-07	1.91349e-09	0.739917	0.258972	0.001091	1.4e-05	0.0930204	0.00475851	159041	198043	357084
6154_2	Medication for pain relief, constipation, heartburn: Ibuprofen (e.g. Nurofen)	0.993638	0.00624695	0.00011162	3.85799e-06	8.41937e-09	0.811568	0.145345	0.04287	0.000208	0.059449	0.00496763	304035	53049	357084
6154_3	Medication for pain relief, constipation, heartburn: Paracetamol	0.993941	0.00588355	0.000174416	1.27707e-06	0	0.764028	0.222759	0.013205	0	0.089273	0.00561667	279148	77936	357084
6154_5	Medication for pain relief, constipation, heartburn: Omeprazole (e.g. Zanprol)	0.993254	0.00664624	9.89433e-05	6.4944e-07	9.83536e-08	0.863274	0.127359	0.006215	0.003141	0.0862689	0.0098339	335620	21464	357084
6155_100	Vitamin and mineral supplements: None of the above	0.993435	0.00644939	0.000113814	1.4179e-06	1.60734e-08	0.837395	0.148378	0.013759	0.000458	0.0513397	0.00479212	112464	246781	359245
6155_3	Vitamin and mineral supplements: Vitamin C	0.993061	0.0068617	7.62975e-05	9.03935e-07	3.06159e-09	0.892054	0.097954	0.009703	0.000278	0.0429933	0.00861808	328295	30950	359245
6155_7	Vitamin and mineral supplements: Multivitamins +/- minerals	0.993397	0.0064817	0.000120703	5.24297e-07	1.79868e-08	0.839875	0.155317	0.004533	0.000265	0.0482589	0.00475194	281773	77472	359245
6157_100	Why stopped smoking: None of the above	0.993031	0.00682075	0.000147419	1.18828e-06	4.36277e-08	0.808879	0.173205	0.012584	0.005323	0.0818113	0.0180088	70768	17748	88516
6157_3	Why stopped smoking: Health precaution	0.99324	0.00666701	9.1558e-05	1.30845e-06	5.39605e-08	0.864203	0.117633	0.014066	0.004088	0.0662803	0.0162772	32853	55663	88516
6159_1	Pain type(s) experienced in last month: Headache	0.994567	0.00521763	0.000211952	3.14043e-06	4.51585e-08	0.676273	0.278331	0.043023	0.002368	0.0881724	0.00627324	288719	71672	360391
6159_100	Pain type(s) experienced in last month: None of the above	0.994101	0.00568869	0.000210194	1.44277e-07	1.5308e-09	0.737382	0.261987	0.000611	1.5e-05	0.0892062	0.00478457	214877	145514	360391
6159_3	Pain type(s) experienced in last month: Neck or shoulder pain	0.993586	0.00626959	0.000144313	2.76309e-07	5.35778e-09	0.8107	0.187563	0.001695	3.2e-05	0.0672725	0.00497093	278271	82120	360391
6159_4	Pain type(s) experienced in last month: Back pain	0.994149	0.00564437	0.000205662	9.72055e-07	0	0.727809	0.262566	0.009618	0	0.0773403	0.00529541	269042	91349	360391
6159_5	Pain type(s) experienced in last month: Stomach or abdominal pain	0.993301	0.00659313	0.000104807	5.73666e-07	3.44429e-08	0.855759	0.13612	0.006132	0.001979	0.0705539	0.00840283	330085	30306	360391
6159_6	Pain type(s) experienced in last month: Hip pain	0.993323	0.00656419	0.000112096	4.225e-07	2.29619e-09	0.850727	0.145481	0.003766	1.6e-05	0.0727133	0.00639329	319891	40500	360391
6159_7	Pain type(s) experienced in last month: Knee pain	0.993807	0.00602779	0.000164089	8.95133e-07	5.51086e-08	0.781409	0.209348	0.008007	0.001228	0.0847569	0.0057968	283763	76628	360391
6160_1	Leisure/social activities: Sports club or gym	0.993943	0.00587176	0.000184835	3.8423e-07	7.27128e-09	0.760268	0.237384	0.002255	8.4e-05	0.0604963	0.00442541	251590	108473	360063
6160_100	Leisure/social activities: None of the above	0.994117	0.0056753	0.000206969	2.96974e-07	3.44429e-09	0.735096	0.263014	0.001859	2.4e-05	0.0623395	0.00511633	251359	108704	360063
6160_2	Leisure/social activities: Pub or social club	0.994065	0.00573816	0.00019607	3.82316e-07	3.32948e-08	0.742927	0.250129	0.005834	0.001103	0.0614722	0.00485676	261564	98499	360063
6160_3	Leisure/social activities: Religious group	0.993933	0.00587769	0.000189053	3.02715e-07	4.97508e-09	0.760385	0.237891	0.001661	5.5e-05	0.10617	0.00766699	307366	52697	360063
6160_4	Leisure/social activities: Adult education class	0.992984	0.00696263	5.08622e-05	2.16072e-06	4.13315e-08	0.905539	0.065807	0.025952	0.00269	0.0668005	0.00774774	334221	25842	360063
6160_5	Leisure/social activities: Other group activity	0.993592	0.00628677	0.000117338	3.65554e-06	3.82699e-10	0.814814	0.150948	0.034225	4e-06	0.03743	0.00429405	279885	80178	360063
6162_1	Types of transport used (excluding work): Car/motor vehicle	0.993092	0.00682478	8.28026e-05	7.98692e-07	1.18637e-08	0.886522	0.106411	0.0069	0.000155	0.0519414	0.00518014	73865	285459	359324
6162_2	Types of transport used (excluding work): Walk	0.993991	0.00581801	0.000190646	4.49671e-07	9.95017e-09	0.752593	0.244751	0.002565	8.4e-05	0.0549804	0.00419684	182390	176934	359324
6162_3	Types of transport used (excluding work): Public transport	0.993892	0.00593422	0.000173647	5.54148e-07	1.60734e-08	0.769666	0.224715	0.005325	0.000286	0.0400174	0.00410866	251597	107727	359324
6162_4	Types of transport used (excluding work): Cycle	0.993348	0.00653568	0.000116352	4.25561e-07	1.07156e-08	0.846705	0.149556	0.003585	0.000144	0.102781	0.00942125	333265	26059	359324
6164_1	Types of physical activity in last 4 weeks: Walking for pleasure (not as a means of transport)	0.994075	0.00572258	0.000202218	2.40335e-07	2.29619e-09	0.741123	0.257572	0.001275	2.3e-05	0.0689939	0.00513823	100689	258574	359263
6164_100	Types of physical activity in last 4 weeks: None of the above	0.993658	0.00619908	0.000141836	1.51893e-06	1.83695e-08	0.802754	0.184066	0.012926	0.000247	0.0971096	0.00962331	338008	21255	359263
6164_2	Types of physical activity in last 4 weeks: Other exercises (eg: swimming, cycling, keep fit, bowling)	0.993915	0.00589828	0.000186406	2.52199e-07	7.65398e-10	0.763448	0.235133	0.001402	9e-06	0.070565	0.00461118	185021	174242	359263
6164_3	Types of physical activity in last 4 weeks: Strenuous sports	0.993689	0.00617769	0.000129868	3.16339e-06	3.82699e-10	0.801207	0.168674	0.030104	7e-06	0.075255	0.00736664	321966	37297	359263
6164_4	Types of physical activity in last 4 weeks: Light DIY (eg: pruning, watering the lawn)	0.993949	0.00586679	0.000183663	4.45461e-07	3.06159e-09	0.759944	0.236594	0.003417	3.7e-05	0.057608	0.00418587	172584	186679	359263
6164_5	Types of physical activity in last 4 weeks: Heavy DIY (eg: weeding, lawn mowing, carpentry, digging)	0.99382	0.00601117	0.000167628	7.87594e-07	4.97508e-09	0.77877	0.215634	0.00555	3.8e-05	0.0566771	0.00416817	202666	156597	359263
6177_1	Medication for cholesterol, blood pressure or diabetes: Cholesterol lowering medication	0.994927	0.00492105	0.000142124	8.9873e-06	7.72669e-07	0.638669	0.188829	0.115045	0.057451	0.16045	0.0151215	127283	38057	165340
6177_100	Medication for cholesterol, blood pressure or diabetes: None of the above	0.994701	0.00507868	0.000214869	5.53153e-06	4.20969e-09	0.658584	0.281012	0.060346	5.2e-05	0.186188	0.011347	54968	110372	165340
6177_2	Medication for cholesterol, blood pressure or diabetes: Blood pressure medication	0.994904	0.00484098	0.000251683	3.56254e-06	2.67889e-08	0.627498	0.328786	0.043026	0.000685	0.225087	0.0122674	124353	40987	165340
6179_1	Mineral and other dietary supplements: Fish oil (including cod liver oil)	0.993552	0.00631302	0.000134103	7.92952e-07	2.29619e-09	0.819054	0.173697	0.007207	3.3e-05	0.0450763	0.00464412	245885	114131	360016
6179_100	Mineral and other dietary supplements: None of the above	0.993474	0.00639013	0.000135197	2.67889e-07	3.44429e-09	0.825512	0.172631	0.001806	4.2e-05	0.0504266	0.00461656	155206	204810	360016
6179_2	Mineral and other dietary supplements: Glucosamine	0.993323	0.00656807	0.000108117	8.0826e-07	1.6456e-08	0.852183	0.139577	0.007982	0.000249	0.0445705	0.00475976	289798	70218	360016
6179_4	Mineral and other dietary supplements: Zinc	0.992702	0.00718594	0.000110738	1.71679e-06	3.5591e-08	0.84674	0.127825	0.019885	0.005538	0.0576401	0.0102077	345614	14402	360016
670_1	Type of accommodation lived in: A house or bungalow	0.993261	0.00663133	0.000107545	3.40219e-07	1.91349e-09	0.859299	0.137064	0.003479	0.000148	0.0303717	0.00671162	33234	326854	360088
680_1	Own or rent accommodation lived in: Own outright (by you or someone in your household)	0.993421	0.00644767	0.000131168	2.64828e-07	1.91349e-09	0.832144	0.166028	0.001798	2e-05	0.0519413	0.00369049	162982	193358	356340
680_2	Own or rent accommodation lived in: Own with a mortgage	0.993156	0.00676367	7.81563e-05	1.63833e-06	4.55412e-08	0.876524	0.100109	0.018964	0.004392	0.0167266	0.00397612	225107	131233	356340
680_3	Own or rent accommodation lived in: Rent - from local authority, local council, housing association	0.993841	0.00598396	0.000174621	2.00917e-07	4.97508e-09	0.773753	0.22491	0.001279	4.9e-05	0.153442	0.0109623	337372	18968	356340
699_irnt	Length of time at current address	0.993968	0.00586265	0.000167498	2.27093e-06	9.95017e-09	0.760556	0.217463	0.021815	0.000159	0.0243666	0.00334648	NA	NA	352690
709	Number in household	0.9932	0.00670534	9.38343e-05	1.0838e-06	1.91349e-09	0.867397	0.119927	0.012645	2e-05	0.0139389	0.00238731	NA	NA	358963
728	Number of vehicles in household	0.993348	0.00653691	0.000114177	4.38956e-07	7.65398e-09	0.847019	0.148646	0.004175	0.00015	0.0318318	0.00271685	NA	NA	358754
767_irnt	Length of working week for main job	0.993131	0.00681481	4.97887e-05	4.71982e-06	3.48256e-08	0.883208	0.063442	0.05245	0.00089	0.0217864	0.00379632	NA	NA	202304
777	Frequency of travelling from home to job workplace	0.993103	0.00681095	8.46327e-05	9.78178e-07	4.59239e-08	0.879093	0.10723	0.011818	0.001848	0.0245526	0.00410701	NA	NA	201267
78_irnt	Heel bone mineral density (BMD) T-score, automated	0.996253	0.00350549	0.00022482	1.6213e-05	9.98844e-08	0.471758	0.308393	0.216044	0.003803	0.315207	0.0310784	NA	NA	206589
806	Job involves mainly walking or standing	0.993866	0.00595838	0.000174877	7.97544e-07	1.60734e-08	0.771208	0.222085	0.006458	0.000241	0.0784464	0.005057	NA	NA	204956
816	Job involves heavy manual or physical work	0.994129	0.0056604	0.000210583	1.74511e-07	3.82699e-10	0.731908	0.267355	0.000729	0	0.0816522	0.0048303	NA	NA	205000
826	Job involves shift work	0.993465	0.00642347	0.000109694	1.34327e-06	7.30955e-08	0.834523	0.141771	0.016064	0.007632	0.0336477	0.0038647	NA	NA	204783
845	Age completed full time education	0.993918	0.00588737	0.000194721	1.79103e-07	0	0.764014	0.235322	0.000657	0	0.104686	0.00473387	NA	NA	240547
864	Number of days/week walked 10+ minutes	0.9942	0.00559318	0.000205746	1.43474e-06	3.82699e-10	0.723825	0.263981	0.012186	1e-06	0.0427893	0.00283901	NA	NA	355030
874_irnt	Duration of walks	0.994185	0.00560484	0.000210261	2.96974e-07	3.06159e-09	0.726017	0.270177	0.003724	7.6e-05	0.0486967	0.00314046	NA	NA	308989
884	Number of days/week of moderate physical activity 10+ minutes	0.994203	0.00558418	0.000212089	5.6716e-07	7.65398e-10	0.722403	0.273401	0.004177	1.1e-05	0.040337	0.00314517	NA	NA	343943
894	Duration of moderate activity	0.993304	0.00658477	0.000111527	1.88288e-07	0	0.85327	0.145055	0.001664	0	0.0286951	0.00321259	NA	NA	268826
904	Number of days/week of vigorous physical activity 10+ minutes	0.993815	0.00601219	0.000172763	2.15459e-07	3.82699e-10	0.777628	0.221254	0.001106	3e-06	0.0344817	0.00256421	NA	NA	344084
914_irnt	Duration of vigorous activity	0.993446	0.00644722	0.000104224	2.45616e-06	1.1481e-09	0.837049	0.133516	0.029414	1.2e-05	0.0318693	0.00377425	NA	NA	196758
924	Usual walking pace	0.993848	0.00596498	0.000187134	1.52697e-07	3.82699e-10	0.774146	0.225218	0.000625	2e-06	0.0824746	0.00373928	NA	NA	358974
ASTHMA_MEDICATIO_COMORB	Medication related adverse effects	0.994009	0.0059173	6.16547e-05	1.17929e-05	2.25792e-08	0.7684	0.079367	0.151498	0.000728	0.0690844	0.010565	341100	20094	361194
C3_OTHER_SKIN	Other malignant neoplasms of skin	0.995265	0.0046787	3.62221e-05	1.78433e-05	1.78452e-06	0.562316	0.043548	0.215236	0.178896	0.171906	0.0297953	346792	14402	361194
C3_SKIN	Malignant neoplasm of skin	0.995053	0.00490691	2.29214e-05	1.5789e-05	1.87178e-06	0.587827	0.027863	0.199763	0.184543	0.159413	0.0290366	344663	16531	361194
CD_sbc	Crohn's disease	0.995036	0.00459842	0.000342621	2.31386e-05	2.25698e-07	0.435635	0.327334	0.229117	0.007913	0.267218	0.007193	34915	25042	59957
COPD_EXCL	COPD differential diagnosis	0.993387	0.00652085	8.98282e-05	2.31533e-06	1.41599e-07	0.842106	0.114317	0.026558	0.017009	0.0580758	0.00829926	334484	26710	361194
E11	NA	0.995518	0.00440604	3.68022e-05	3.89151e-05	3.29121e-08	0.565384	0.045062	0.389069	0.000483	0.199183	0.1106	360489	705	360489
G6_NERPLEX	Nerve, nerve root and plexus disorders	0.993948	0.00593836	0.000105283	8.31107e-06	6.81204e-08	0.770721	0.136573	0.091058	0.001639	0.12492	0.0149261	350296	10898	361194
H26	Diagnoses - main ICD10: H26 Other cataract	0.994037	0.00586278	9.15932e-05	9.02442e-06	8.30456e-08	0.761005	0.117746	0.115666	0.005576	0.0866484	0.0153852	349888	11306	361194
H40	NA	0.994078	0.0058694	3.83694e-05	1.38717e-05	1.81399e-07	0.758283	0.048481	0.173039	0.02019	0.0571532	0.0561652	359479	1715	361194
H7_LENS	Disorders of lens	0.994104	0.0058315	5.08293e-05	1.3784e-05	6.58242e-08	0.756777	0.065619	0.174566	0.003031	0.098466	0.0122047	344118	17076	361194
I83	Diagnoses - main ICD10: I83 Varicose veins of lower extremities	0.994432	0.00543534	0.000121757	1.13298e-05	1.03329e-08	0.706596	0.15989	0.132192	0.001315	0.189299	0.0246916	352431	8763	361194
I84	Diagnoses - main ICD10: I84 Haemorrhoids	0.993719	0.00617531	0.000100745	5.43968e-06	7.65398e-10	0.796838	0.129278	0.073868	7e-06	0.0574753	0.0134822	349092	12102	361194
I9_DISVEINLYMPH	Diseases of veins, lymphatic vessels and lymph nodes, not elsewhere classified	0.994298	0.00559142	9.87064e-05	1.20202e-05	3.44429e-09	0.723967	0.129342	0.146649	3.5e-05	0.15363	0.0193461	349327	11867	361194
I9_IHD	Ischaemic heart disease, wide definition	0.994821	0.00499862	0.000171636	7.92301e-06	4.87176e-07	0.647253	0.22643	0.081778	0.044535	0.156288	0.0168717	340337	20857	361194
ICDMAIN_ANY_ENTRY	Any ICDMAIN event in hilmo or causes of death	0.993437	0.00644039	0.000121752	1.00191e-06	1.91349e-09	0.835453	0.156103	0.008412	2.2e-05	0.0549364	0.00504753	79185	282009	361194
II_NEOPLASM	Neoplasms	0.994319	0.00556528	0.000104804	1.09846e-05	8.3811e-08	0.719269	0.134788	0.142619	0.003317	0.0278175	0.00533462	291016	70178	361194
IX_CIRCULATORY	Diseases of the circulatory system	0.993862	0.00599171	0.000143532	2.41445e-06	5.16643e-08	0.774351	0.188996	0.034558	0.002088	0.0571355	0.00658312	300690	60504	361194
K11_GALLBILPANC	Disorders of gallbladder, biliary tract and pancreas	0.99455	0.00538874	4.99353e-05	1.04902e-05	5.97393e-07	0.700302	0.064486	0.136259	0.098946	0.122044	0.0169493	347272	13922	361194
K11_HERNIA	Hernia	0.99408	0.00583363	7.60109e-05	1.08204e-05	8.03668e-09	0.758988	0.098793	0.142008	0.000204	0.0581688	0.00942814	334997	26197	361194
K21	Diagnoses - main ICD10: K21 Gastro-oesophageal reflux disease	0.99326	0.00664883	9.00663e-05	1.18866e-06	6.7355e-08	0.864997	0.114654	0.013454	0.006884	0.0819899	0.014502	350451	10743	361194
K57	Diagnoses - main ICD10: K57 Diverticular disease of intestine	0.993994	0.00588916	0.000108355	7.96396e-06	4.09488e-08	0.764122	0.14164	0.09286	0.00137	0.129184	0.0131723	348532	12662	361194
K80	Diagnoses - main ICD10: K80 Cholelithiasis	0.994683	0.00521939	8.88313e-05	8.05313e-06	6.62834e-07	0.660514	0.112641	0.10812	0.11872	0.137236	0.0206406	350674	10520	361194
KNEE_ARTHROSIS	Gonarthrosis [arthrosis of knee](FG)	0.993646	0.00622126	0.000129747	2.47989e-06	3.13813e-08	0.806063	0.169809	0.023379	0.000741	0.140999	0.0143239	349294	11900	361194
M13_ARTHROSIS	Arthrosis	0.993982	0.00583337	0.000183211	1.00152e-06	4.20969e-09	0.754555	0.23734	0.008056	4.1e-05	0.115554	0.0122545	336217	24977	361194
M13_MENISCUSDERANGEMENTS	Meniscus derangement	0.993253	0.00666774	7.6689e-05	2.92994e-06	1.45426e-08	0.864631	0.097953	0.036931	0.000475	0.0762352	0.0139703	350363	10831	361194
M13_OTHERJOINT	Other joint disorders	0.993366	0.00653989	9.13758e-05	2.64407e-06	2.52581e-08	0.850003	0.118224	0.030033	0.001731	0.0694879	0.00878811	333847	27347	361194
M17	Diagnoses - main ICD10: M17 Gonarthrosis [arthrosis of knee]	0.993948	0.00588273	0.000167437	1.70531e-06	1.30118e-08	0.763624	0.218721	0.017443	0.000205	0.14436	0.0146653	349697	11497	361194
M23	Diagnoses - main ICD10: M23 Internal derangement of knee	0.993357	0.0065542	8.61719e-05	2.65593e-06	3.82699e-09	0.852963	0.1109	0.035979	0.000148	0.0748232	0.0133941	349363	11831	361194
N39	Diagnoses - main ICD10: N39 Other disorders of urinary system	0.993226	0.00669011	8.28861e-05	6.56711e-07	1.40833e-07	0.87088	0.106508	0.008194	0.014407	0.0639347	0.0138077	350643	10551	361194
PULMONARYDG	Other pulmonary diagnosis	0.993157	0.00676349	7.94797e-05	2.67506e-07	2.06275e-07	0.872713	0.100971	0.003854	0.022451	0.0591486	0.00864667	335813	25381	361194
PULM_MEDICATIO_COMORB	Medication related adverse effects (Asthma/COPD)	0.993903	0.00602707	6.03608e-05	9.87631e-06	1.6456e-07	0.782761	0.077979	0.1269	0.012352	0.0561436	0.0103691	339488	21706	361194
R07	Diagnoses - main ICD10: R07 Pain in throat and chest	0.993194	0.00670802	9.75411e-05	3.99538e-07	8.03668e-09	0.870887	0.125655	0.003254	0.000193	0.100279	0.00917316	336664	24530	361194
R10	Diagnoses - main ICD10: R10 Abdominal and pelvic pain	0.993368	0.00653926	9.03644e-05	2.45846e-06	2.48754e-08	0.850443	0.115994	0.031999	0.001554	0.0624203	0.00922019	340954	20240	361194
R31	Diagnoses - main ICD10: R31 Unspecified haematuria	0.993648	0.00629284	5.11764e-05	7.9544e-06	2.52581e-08	0.818056	0.065474	0.114886	0.001575	0.0607241	0.013451	349911	11283	361194
SCZ_sbc	schizophrenia	0.993492	0.00636118	0.00014671	1.84078e-07	2.67889e-09	0.818455	0.180459	0.001048	3e-05	0.271809	0.004357	77258	53386	130644
VII_EYE_ADNEXA	Diseases of the eye and adnexa	0.993935	0.00599342	6.17565e-05	9.78561e-06	2.52581e-07	0.77846	0.07953	0.125149	0.016853	0.0527504	0.00830087	331316	29878	361194
VI_NERVOUS	Diseases of the nervous system	0.993196	0.00671386	8.90238e-05	1.07577e-06	4.28623e-08	0.871926	0.115196	0.011947	0.00092	0.0746052	0.00966336	339871	21323	361194
XIII_MUSCULOSKELET	Diseases of the musculoskeletal system and connective tissue	0.993965	0.00584395	0.000191311	1.31266e-07	1.91349e-09	0.756136	0.243142	0.000663	5.1e-05	0.09083	0.00736317	284095	77099	361194
XIV_GENITOURINARY	Diseases of the genitourinary system	0.99347	0.00640652	0.000123088	4.93681e-07	2.44927e-08	0.833771	0.160263	0.005546	0.00041	0.0375603	0.00551006	289574	71620	361194
XIX_INJURY_POISON	Injury, poisoning and certain other consequences of external causes	0.99362	0.00629289	8.11861e-05	6.26019e-06	4.93681e-08	0.819108	0.104533	0.074595	0.001754	0.0499681	0.00571735	316398	44796	361194
XI_DIGESTIVE	Diseases of the digestive system	0.993429	0.0064481	0.000121896	7.12585e-07	1.1481e-08	0.83459	0.156792	0.008378	0.00023	0.0557088	0.00441677	245301	115893	361194
XVIII_MISCFINDINGS	Symptoms, signs and abnormal clinical and laboratory findings, not elsewhere classified	0.993708	0.00613198	0.000159229	4.82201e-07	3.82699e-09	0.793064	0.204	0.002889	3.9e-05	0.0617654	0.00493555	263592	97602	361194
is_female	is_female, based on inferred genetic sex	0.992979	0.00698213	3.47697e-05	4.1542e-06	2.67889e-09	0.906772	0.044857	0.048282	7.8e-05	0.0208094	0.00382711	167020	194174	361194
